# Supplementary material for: Prediction of source contributions to urban background PM 10 concentrations in European cities: a case study for an episode in December 2016 using EMEP/MSC-W rv4.15 – Part 2: The city contribution
Source: Copernicus journal article supplement (doi:10.5194/gmd-14-4143-2021), 2021-07-01
Supplement: Supplementary file 1 [file gmd-14-4143-2021-supplement.zip]

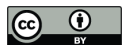

*Supplement of*

**Prediction of source contributions to urban background PM<sub>10</sub> concentrations in European cities: a case study for an episode in December 2016 using EMEP/MSC-W rv4.15 – Part 2: The city contribution**

**Matthieu Pommier**

*Correspondence to:* Matthieu Pommier ([matthieu.pommier@ricardo.com](mailto:matthieu.pommier@ricardo.com))

- [gmd-14-4143-2021-supplement-title-page.pdf](#)
- [catalogue\\_MeanContrib\\_percity\\_01-09Dec2016.xlsx](#)
- [supplement.docx](#)

The copyright of individual parts of the supplement might differ from the article licence.
