# Supplementary material for: Prediction of source contributions to urban background PM 10 concentrations in European cities: a case study for an episode in December 2016 using EMEP/MSC-W rv4.15 – Part 2: The city contribution
Source: Copernicus journal article supplement (doi:10.5194/gmd-14-4143-2021), 2021-07-01
Supplement: Supplementary file 2 [file gmd-14-4143-2021-supplement.zip]

Archive with 3 entries (3 files):
- catalogue_MeanContrib_percity_01-09Dec2016.xlsx
- supplement.docx
- gmd-14-4143-2021-supplement-title-page.pdf
