# Supplementary material for: Prediction of source contributions to urban background PM 10 concentrations in European cities: a case study for an episode in December 2016 using EMEP/MSC-W rv4.15 – Part 2: The city contribution
Source: Copernicus journal article supplement (doi:10.5194/gmd-14-4143-2021), 2021-07-01
Supplement: Supplementary file 2 [file gmd-14-4143-2021-supplement.zip › catalogue_MeanContrib_percity_01-09Dec2016.xlsx]

## Sheet: MeanContrib_percity_01-09Dec201
city	mean contribution (%)	2021-12-01	2021-12-02	2021-12-03	2021-12-04	2021-12-05	2021-12-06	2021-12-07	2021-12-08	2021-12-09
Vienna	PM10 daily mean (ug/m3)	20.83	11.44	20.5	25.74	24.21	32.97	30.91	22.11	19.22
Vienna	city	6.3	15.31	15.59	20.38	18	7.81	17.03	23.47	7.21
Vienna	RestEurope	83.98	64.49	66.95	66.17	70.86	71.64	72.11	68.1	90.83
Vienna	ExtraSource	9.72	20.21	17.46	13.45	11.13	20.54	10.86	8.43	1.97
Vienna	Domestic country	11.52	21.49	28.99	30.88	31.7	28.92	33.42	62.54	17.21
Vienna	City / Domestic country	55.09	67.84	58.19	63.42	56.1	28.38	50.71	37.64	42.81
Vienna	Domestic country (without City) / RestEurope	6.24	9.99	18.99	15.5	20.5	31.22	22.38	57.16	11.29
Brussels	PM10 daily mean (ug/m3)	34.46	22.93	27.42	15.77	24.53	30.43	24.66	21.33	28.43
Brussels	city	4.68	7.31	3.72	9.95	13.13	8.54	5.42	5.52	4.93
Brussels	RestEurope	55.45	46.19	32.25	61.41	74.89	75.32	90.48	101	92.89
Brussels	ExtraSource	39.87	46.5	64.03	28.63	11.98	16.14	4.1	-6.52	2.19
Brussels	Domestic country	14.9	19.59	4.75	19.97	23.49	19.53	13.3	9.31	8.43
Brussels	City / Domestic country	32.21	35.2	-46.15	50.59	56.56	43.38	42.26	57.83	57.19
Brussels	Domestic country (without City) / RestEurope	20.51	29.42	0.13	15.99	13.84	14.92	8.95	3.8	3.74
Sofia	PM10 daily mean (ug/m3)	14.22	11.44	9.07	15.57	17.78	16.2	27.24	22.57	11.73
Sofia	city	23.71	23.53	34.79	60.83	58.77	30.66	17.97	34.37	39.09
Sofia	RestEurope	70.04	68.86	57.79	39.97	39.22	58.98	77.13	57.89	57.61
Sofia	ExtraSource	6.25	7.61	7.43	-0.81	2.02	10.36	4.9	7.74	3.29
Sofia	Domestic country	24.95	28.4	35.83	63.03	80.64	38.62	21.32	50.16	42.58
Sofia	City / Domestic country	95.18	85.37	96.98	96.23	72.17	83.51	86.54	68.34	92.58
Sofia	Domestic country (without City) / RestEurope	1.8	7.04	1.82	5.64	48.88	16.94	4.87	27.24	6.42
Zagreb	PM10 daily mean (ug/m3)	17.11	14.96	13.28	19.64	31.8	34.96	43.15	29.62	27.02
Zagreb	city	26.78	24.1	28.3	14.7	17.82	21.28	16.03	23.83	17.2
Zagreb	RestEurope	71.96	80.46	70.65	78.94	76.04	70.03	71.6	75.3	93.07
Zagreb	ExtraSource	1.26	-4.55	1.05	6.36	6.14	8.69	12.37	0.87	-10.27
Zagreb	Domestic country	37.98	32.3	41.7	28.42	33.14	34.14	28	47.47	25.33
Zagreb	City / Domestic country	69.59	70.07	68.53	51.44	53.74	60.62	57.91	50.26	69.04
Zagreb	Domestic country (without City) / RestEurope	15.29	10.63	18.98	17.4	20.02	18.73	16.77	31.87	8.61
Nicosia	PM10 daily mean (ug/m3)	1.82	8.44	9.19	7.21	7.2	10.18	7.1	10.73	5.82
Nicosia	city	26.3	2.73	4.48	17.1	12.13	7.35	9.42	5.15	7.09
Nicosia	RestEurope	18.39	32.98	47.54	56.14	64.52	60.83	60.92	62.61	58.94
Nicosia	ExtraSource	55.31	64.29	47.99	26.76	23.35	31.82	29.65	32.23	33.97
Nicosia	Domestic country	34.44	2.79	4.99	27.37	16.81	8.27	10.03	5.25	7.34
Nicosia	City / Domestic country	79.77	98.02	88.29	61.86	79.97	90.37	93.61	97.92	95.86
Nicosia	Domestic country (without City) / RestEurope	38.31	0.17	1.03	18.3	8.14	1.41	0.97	0.15	0.44
Prague	PM10 daily mean (ug/m3)	18.72	9.69	19.32	26.03	32.86	28.72	24.15	24.25	21.95
Prague	city	7.55	14.59	20.48	24.71	21.91	12.75	12.02	7.32	7.21
Prague	RestEurope	66	45.37	58.72	49.74	69.74	75.82	76.37	89.59	89.89
Prague	ExtraSource	26.44	40.03	20.8	25.56	8.34	11.43	11.61	3.09	2.9
Prague	Domestic country	14.5	24.73	29.86	51.04	67.96	33.82	40.99	14.08	14.69
Prague	City / Domestic country	52.55	58.05	63.77	48.73	31.97	36.82	28.9	51.5	54.56
Prague	Domestic country (without City) / RestEurope	10.81	24.58	16.37	52.56	66.47	28.09	38.55	7.55	8.44
Copenhagen	PM10 daily mean (ug/m3)	16.07	7.76	11.06	9.53	11.81	18.01	21.21	35.52	22.56
Copenhagen	city	7.02	13.73	15.45	11.62	8.59	22.85	6.17	2.93	6.04
Copenhagen	RestEurope	6.41	17.53	57.73	51.47	46.46	46.39	63.01	34.8	37.21
Copenhagen	ExtraSource	86.56	68.75	26.82	36.91	44.95	30.76	30.82	62.26	56.75
Copenhagen	Domestic country	8.92	16.83	43.54	35.09	23.37	29.46	18.08	8.4	14.83
Copenhagen	City / Domestic country	77.03	87.72	40.66	32.78	37.69	74.79	44.12	38.5	41.11
Copenhagen	Domestic country (without City) / RestEurope	36.19	16.45	44.85	45.74	31.21	13.98	18.03	16.74	22.53
Tallinn	PM10 daily mean (ug/m3)	5.29	9.16	5.43	6.1	6.22	4.57	7.6	5.12	3.98
Tallinn	city	38.42	52.69	18.27	26.8	16.23	30.48	15.8	48.75	37.29
Tallinn	RestEurope	10.8	25.29	23.98	24.76	11.72	39.55	36.61	31.34	32.44
Tallinn	ExtraSource	50.79	22.02	57.75	48.45	72.05	29.96	47.59	19.91	30.27
Tallinn	Domestic country	39.79	59.9	16.56	29.08	14.94	29.3	18.26	47.49	35.02
Tallinn	City / Domestic country	102.89	93.89	111.4	95.28	108.91	105.91	88.46	102.71	107.66
Tallinn	Domestic country (without City) / RestEurope	-4.82	34.36	-7.35	7.69	-14.45	-3.59	9.53	-12.58	-8.52
Helsinki	PM10 daily mean (ug/m3)	7.95	9.31	5.45	5.86	5.29	5.33	8.09	11.36	5.83
Helsinki	city	31.29	25.77	15.86	18.31	21.96	27.74	12.97	44.23	26.74
Helsinki	RestEurope	24.96	50.94	28.98	28.5	18.86	45.44	39.04	40.82	53.55
Helsinki	ExtraSource	43.75	23.29	55.15	53.19	59.17	26.81	47.99	14.95	19.7
Helsinki	Domestic country	54.69	74	37.89	37.01	35.97	61.96	18.96	69.9	66.9
Helsinki	City / Domestic country	57.38	35.27	42.22	56.78	60.82	44.39	69.31	63.66	40.71
Helsinki	Domestic country (without City) / RestEurope	92.7	93.57	76.15	66.01	76.82	74.93	22.89	61.48	76.12
Paris	PM10 daily mean (ug/m3)	42.41	52.49	32.11	24.01	30.61	32.56	30.19	25.17	26.41
Paris	city	43.85	27.68	13.76	16.06	32.24	28.74	23.93	24.77	22.61
Paris	RestEurope	39.19	56.9	50.87	73.05	65.06	65.37	69.15	81.56	83.36
Paris	ExtraSource	16.96	15.41	35.37	10.88	2.7	5.89	6.91	-6.33	-5.98
Paris	Domestic country	72.63	54.34	27.48	42.05	75.07	81.06	80.41	85.81	76.75
Paris	City / Domestic country	59.81	49.75	51.33	39.63	41.85	35.12	29.42	28.82	29.96
Paris	Domestic country (without City) / RestEurope	73.57	46.24	27.68	35.28	66.36	80.22	81.79	74.48	64.39
Berlin	PM10 daily mean (ug/m3)	18.2	9.12	19.25	33.13	30.21	24	27.16	20.09	27.85
Berlin	city	8.62	17.55	15.32	24.97	14.35	14.92	9.23	10.06	7.8
Berlin	RestEurope	25.68	28.18	66.96	47.23	66.31	39.78	67.95	98.64	82.58
Berlin	ExtraSource	65.71	54.27	17.71	27.8	19.35	45.29	22.82	-8.7	9.62
Berlin	Domestic country	21.21	29.6	57.35	66.51	73.37	44.38	61.75	78.66	39.21
Berlin	City / Domestic country	40.68	65.58	27.26	36.79	19.99	33.66	16.66	12.75	21.57
Berlin	Domestic country (without City) / RestEurope	53.63	38.81	62.9	87.9	88.78	72.61	77.29	69.74	37.25
Athens	PM10 daily mean (ug/m3)	10.49	12.11	13.12	11.22	12.23	16.02	16.28	13.84	19.31
Athens	city	22.05	33.19	32.85	20.83	17.87	49.64	35.19	21.26	56.31
Athens	RestEurope	56.83	44.92	43.9	53.79	41.9	34.95	45	42	33.47
Athens	ExtraSource	21.13	21.89	23.25	25.38	40.23	15.41	19.81	36.73	10.22
Athens	Domestic country	32.59	42.24	43.34	29.01	21	54.54	44.96	24.72	65.56
Athens	City / Domestic country	68.48	79.86	74.95	72.08	84.73	90.5	75.57	86.04	85.93
Athens	Domestic country (without City) / RestEurope	17.94	19.57	22.82	15.17	7.54	15.33	25.36	8.16	27.16
Budapest	PM10 daily mean (ug/m3)	17.25	9.14	15.19	18.65	23.94	34.19	29.96	37.73	29.21
Budapest	city	7.82	16.16	12.5	27.46	23.91	10.66	13.38	8.55	6.91
Budapest	RestEurope	79.44	69.36	71.65	61.76	63.09	84.63	77.56	87.52	92.44
Budapest	ExtraSource	12.73	14.48	15.84	10.79	13	4.72	9.05	3.93	0.65
Budapest	Domestic country	10.5	18.69	14.73	31.9	52.69	32.34	37.51	30.86	14.62
Budapest	City / Domestic country	75.39	82.94	84.67	84.75	44.93	40.37	40.21	29.11	56.24
Budapest	Domestic country (without City) / RestEurope	3.43	3.79	3.14	9.07	45.68	26.44	31.14	25.54	8.56
Reykjavik	PM10 daily mean (ug/m3)	12.24	15.25	5.2	20.02	16.79	9.65	8.52	6.47	4.64
Reykjavik	city	37.01	10.08	27.73	9.22	11.27	17.65	26.88	54.25	33.25
Reykjavik	RestEurope	14.28	16.19	11.41	14.68	22.65	41.67	65.72	34.08	30.75
Reykjavik	ExtraSource	48.72	73.73	60.86	76.1	66.08	40.68	7.39	11.67	35.99
Reykjavik	Domestic country	48.94	10.17	33.09	11.1	11.6	20.59	88.81	88.07	61.78
Reykjavik	City / Domestic country	82.39	99.69	84.64	88.55	98.44	93.4	30.74	62.02	59.51
Reykjavik	Domestic country (without City) / RestEurope	65.04	0.73	49.75	23.95	1.27	8.17	93.5	98.98	85.67
Dublin	PM10 daily mean (ug/m3)	21.24	26.05	12.04	18.02	26.36	16.99	24.12	8.4	11.76
Dublin	city	34.96	30.24	10.23	5.46	6.15	6.41	2.19	26.88	10.26
Dublin	RestEurope	50.16	57.19	52.51	58.17	74.71	50.42	14.22	21.25	19.25
Dublin	ExtraSource	14.88	12.57	37.26	36.37	19.14	43.17	83.6	51.88	70.49
Dublin	Domestic country	74.73	53.48	10.98	5.54	7.41	9.36	3.92	43.47	15.37
Dublin	City / Domestic country	46.79	55.55	95.78	98.66	83.43	67.13	58.26	57.9	60.94
Dublin	Domestic country (without City) / RestEurope	79.72	40.58	1.39	0.14	1.68	7.08	21.92	73.89	33.96
Rome	PM10 daily mean (ug/m3)	14.67	18.23	15.33	14.4	12.09	14.11	10.16	15.35	19.58
Rome	city	19.41	20.4	24.24	23.64	22.74	25.69	24.59	33.68	24.39
Rome	RestEurope	83.17	62.63	73.89	89.3	76.2	79.62	81.47	73.36	83.92
Rome	ExtraSource	-2.58	16.97	1.86	-12.95	1.06	-5.31	-6.06	-7.04	-8.32
Rome	Domestic country	70.13	47.34	70.99	91.09	77.75	88.33	86.75	86.75	90.82
Rome	City / Domestic country	27.42	44.33	34.01	26.01	33.45	29.78	29.67	37.07	26.85
Rome	Domestic country (without City) / RestEurope	61.71	41.51	62.92	75.29	67.89	78.06	74.76	73.42	79.26
Riga	PM10 daily mean (ug/m3)	5.58	10.42	6.54	8.78	7.25	7.55	8.79	9.71	6.13
Riga	city	37.76	57.7	33.4	38.26	17.63	45.07	24.19	18.98	28.22
Riga	RestEurope	23.34	36.45	15.7	26.49	25.81	21.21	50.07	35.52	35.24
Riga	ExtraSource	38.9	5.85	50.9	35.25	56.56	33.72	25.74	45.49	36.54
Riga	Domestic country	51.09	81.22	34.83	47.71	20.56	49.38	40.28	22.41	36.48
Riga	City / Domestic country	77.31	69.34	96.94	78.82	84.63	93.76	62.68	84.52	78.77
Riga	Domestic country (without City) / RestEurope	53.54	63.55	3.75	34.41	15.28	15.64	35.82	12.69	24.35
Vilnius	PM10 daily mean (ug/m3)	6.75	16.01	8.82	9.45	12.94	5.35	10.95	13.68	15.63
Vilnius	city	16.84	17.93	9.69	13.15	6.17	15.58	12.92	7.44	6.92
Vilnius	RestEurope	63.08	72.45	41.86	46.51	68.2	48.27	72.17	52.17	29.92
Vilnius	ExtraSource	20.08	9.62	48.45	40.34	25.63	36.15	14.9	40.39	63.16
Vilnius	Domestic country	45.5	44.98	27.42	31.52	13.75	29.42	32.11	11.67	16.07
Vilnius	City / Domestic country	36.66	50.68	38.46	39.23	47.65	50.93	43.44	56.01	40.37
Vilnius	Domestic country (without City) / RestEurope	46.28	38.45	43.43	40.2	12.52	30.38	27.32	9.67	28.78
Luxembourg	PM10 daily mean (ug/m3)	27.02	29.89	18.82	13.65	23.74	33.92	39.08	28.92	23.79
Luxembourg	city	10.21	9.46	6.51	8.65	14.63	18.74	18.8	13.56	12.84
Luxembourg	RestEurope	72.66	60.58	58.53	76.07	66.73	54.61	67.76	78.62	94.07
Luxembourg	ExtraSource	17.13	29.96	34.96	15.28	18.63	26.65	13.45	7.83	-6.91
Luxembourg	Domestic country	9.32	8.95	5.02	6.46	10.57	13.49	12.85	11.6	11.34
Luxembourg	City / Domestic country	109.8	108.52	130.37	133.93	142.51	139.53	143	119.52	112.95
Luxembourg	Domestic country (without City) / RestEurope	-1.22	-0.88	-2.56	-2.9	-6.28	-9.79	-9.4	-2.54	-1.64
Valletta	PM10 daily mean (ug/m3)	6.49	4.94	6.38	15.54	22.3	33.54	13.82	4.37	2.42
Valletta	city	3.6	6	4.75	5.22	2.42	0.92	2.28	9.92	40.31
Valletta	RestEurope	26.59	32.13	23.1	6.34	8.44	0.37	0.78	21.28	15.08
Valletta	ExtraSource	69.81	61.87	72.15	88.45	89.14	98.72	96.94	68.8	44.61
Valletta	Domestic country	2.56	4.57	3.31	3.73	1.94	0.64	1.6	6.72	32.6
Valletta	City / Domestic country	148.86	141.83	154.64	156	98.67	119.58	120.71	171.07	168.54
Valletta	Domestic country (without City) / RestEurope	-4.08	-4.79	-7.47	-23.57	-5.93	-163.32	-104.84	-17.69	-76.63
Amsterdam	PM10 daily mean (ug/m3)	18.95	18.62	13.41	20.66	22.8	32.13	29.75	25.25	30.42
Amsterdam	city	10.94	11.19	15.59	7.83	13.36	8.87	5.05	6.22	6.35
Amsterdam	RestEurope	27.9	4.62	19.23	67.87	63.03	62.28	74.65	73.76	72.99
Amsterdam	ExtraSource	61.16	84.19	65.18	24.3	23.62	28.85	20.3	20.02	20.66
Amsterdam	Domestic country	12.03	12.54	24.3	18.17	23.22	28.16	9.95	10.35	9.78
Amsterdam	City / Domestic country	90.85	90.33	74.22	46.43	62.73	31.31	84.84	95.06	78.44
Amsterdam	Domestic country (without City) / RestEurope	4.74	27.55	37.1	15	14.57	30.99	6.56	5.51	4.85
Rotterdam	PM10 daily mean (ug/m3)	21.41	18.62	15.94	29.1	24.52	38.34	28.18	23.67	30.46
Rotterdam	city	8.99	8.88	12.6	5.55	15.07	11.2	5.63	7.03	5.16
Rotterdam	RestEurope	48.27	14.5	22.77	51.49	56.52	67.2	81.95	85	88.94
Rotterdam	ExtraSource	42.74	76.62	64.63	42.96	28.41	21.61	12.42	7.97	5.9
Rotterdam	Domestic country	10.8	17.47	30.07	10.66	21.72	17.59	6.53	7.28	6.28
Rotterdam	City / Domestic country	83.06	62.35	44.77	63.4	75.7	63.36	93.14	100.42	86.34
Rotterdam	Domestic country (without City) / RestEurope	4.11	49.42	89.2	12.48	9.48	9.84	1.11	0.22	1.24
Oslo	PM10 daily mean (ug/m3)	9.74	4.55	14.82	15.6	6.37	16.66	8.57	5.85	8.47
Oslo	city	60.67	68.84	67.16	49.88	65.65	56.24	39.4	54.1	51.08
Oslo	RestEurope	30.3	9.63	14.05	37.55	18.81	34.73	42.61	28.93	16.27
Oslo	ExtraSource	9.03	21.53	18.8	12.57	15.54	9.03	17.99	16.97	32.65
Oslo	Domestic country	90.51	78.17	80.85	84.79	78.85	89.9	65.53	78.76	66.6
Oslo	City / Domestic country	67.75	88.21	83.36	58.9	83.13	61.48	59.34	67.92	76.42
Oslo	Domestic country (without City) / RestEurope	98.2	96.52	96.94	92.44	70.12	97.63	69.38	88.77	94.6
Warsaw	PM10 daily mean (ug/m3)	13.24	7.5	8.31	27.29	26.78	18.61	27.27	24.55	22.77
Warsaw	city	41.86	38.61	34.65	18.6	14.23	23.71	27.92	11.03	18.27
Warsaw	RestEurope	41.97	47.15	43.74	71.1	73.29	62.88	58.17	89.29	71.82
Warsaw	ExtraSource	16.17	14.25	21.6	10.3	12.48	13.41	13.9	-0.32	9.91
Warsaw	Domestic country	78.53	78	68.46	64.33	56.86	60.01	75.96	36	46.98
Warsaw	City / Domestic country	51.73	49.72	49.51	29.18	25.57	36.75	36.99	31.67	35.37
Warsaw	Domestic country (without City) / RestEurope	90.55	84.25	78.21	63.94	58.32	61.54	82.82	27.97	41.23
Lisbon	PM10 daily mean (ug/m3)	8.49	12.65	6.89	5.48	6.34	11.04	18.35	13.82	11.95
Lisbon	city	52.68	34.53	33.4	42.65	65.37	57.49	45.29	30.81	22.24
Lisbon	RestEurope	23.39	36.2	12.27	19.22	28.48	51.38	58.03	60.6	36.43
Lisbon	ExtraSource	23.93	29.26	54.33	38.13	6.15	-8.86	-3.32	8.59	41.33
Lisbon	Domestic country	66.41	55.79	42.11	56.87	75.49	75.34	69.26	42.84	29.75
Lisbon	City / Domestic country	78.21	65.75	80.58	73.91	86.84	76.9	65.69	74.16	74.64
Lisbon	Domestic country (without City) / RestEurope	61.4	54.09	73.18	76.14	36.66	37.41	42.83	19.04	22.99
Bucharest	PM10 daily mean (ug/m3)	20	10.77	9.95	20.81	20.2	26.39	24.96	25.51	19.12
Bucharest	city	11.24	20.41	22.98	19.19	25.42	14.97	22.6	10.76	14.26
Bucharest	RestEurope	85.89	77.51	81.72	78.2	71.9	88.24	75.47	89.12	94.8
Bucharest	ExtraSource	2.87	2.08	-4.71	2.61	2.68	-3.21	1.93	0.12	-9.06
Bucharest	Domestic country	41.83	45.4	66.34	66.84	63.33	63.93	62.64	47.77	55.03
Bucharest	City / Domestic country	25.95	44.72	34.78	28.59	40.93	23.67	35.79	22.58	24.81
Bucharest	Domestic country (without City) / RestEurope	35.75	35.91	53.11	61.12	51.89	55.59	52.95	41.48	43.78
Bratislava	PM10 daily mean (ug/m3)	18.92	10.28	18.42	24.42	26.49	29.59	28.42	32.62	20.04
Bratislava	city	4.75	10.99	9.97	21.87	8.33	7.41	12.15	11.92	6.15
Bratislava	RestEurope	84.48	67.77	73.55	63.46	81.79	83	73.93	82.06	90.78
Bratislava	ExtraSource	10.78	21.24	16.48	14.67	9.88	9.59	13.91	6.01	3.07
Bratislava	Domestic country	2.75	7.68	8.22	28.81	16.47	6.71	13.96	8	4.16
Bratislava	City / Domestic country	173.62	161.37	140.85	83.24	61.3	112.44	85.04	153.41	156.75
Bratislava	Domestic country (without City) / RestEurope	-2.41	-5.83	-2.36	9.47	9.98	-0.82	2.51	-4.79	-2.26
Ljubljana	PM10 daily mean (ug/m3)	21.8	22.19	14.16	22.67	26.93	24.48	41.87	30.8	32.3
Ljubljana	city	25.25	29.27	33.68	20.31	31.07	44.6	26.3	41.05	18.21
Ljubljana	RestEurope	75.56	65.07	67.23	72.83	60.93	53.5	68.03	62.01	84.23
Ljubljana	ExtraSource	-0.81	5.67	-0.91	6.86	8	1.9	5.67	-3.06	-2.44
Ljubljana	Domestic country	34.44	36.74	52.63	33.53	46.86	66.75	46.04	60.29	28.95
Ljubljana	City / Domestic country	70.46	77.52	63.49	60.3	63.87	66.34	56.66	66.71	62.06
Ljubljana	Domestic country (without City) / RestEurope	12.27	12.05	28.27	18.16	27.16	40.88	29.34	32.65	12.97
Barcelona	PM10 daily mean (ug/m3)	20.41	17.3	16.9	8.94	16.64	13.49	13.96	16.58	13.99
Barcelona	city	22.99	25.37	17.29	18.32	6.98	21.54	23.21	25.02	26.6
Barcelona	RestEurope	65.28	71.79	78.94	42.47	14.49	38.51	73.11	54.97	62.8
Barcelona	ExtraSource	11.73	2.84	3.77	39.21	78.52	39.94	3.68	20.01	10.6
Barcelona	Domestic country	65.62	81.47	67.22	38.88	9.6	31.22	53.3	39.55	71.15
Barcelona	City / Domestic country	34.97	31.1	25.95	62.9	73.85	69.09	46.27	65.07	37.43
Barcelona	Domestic country (without City) / RestEurope	65.29	78.13	64.7	34.24	17.62	24.48	41.21	25.39	70.77
Madrid	PM10 daily mean (ug/m3)	10.24	15.27	13.21	3.99	6.28	13	23.25	17.13	14.36
Madrid	city	31.84	47.05	33.73	44.89	40.95	35.24	51.01	29.7	31.42
Madrid	RestEurope	47.44	52.83	55.78	41.85	48.12	54.7	44.21	66.43	60.57
Madrid	ExtraSource	20.71	0.12	10.49	13.26	10.93	10.06	4.78	3.87	8.01
Madrid	Domestic country	60	90.32	85.54	78.08	79.02	82.39	92.19	85.35	73.44
Madrid	City / Domestic country	51.21	51.11	40.48	58.1	51.46	42.16	55.5	35.26	42.86
Madrid	Domestic country (without City) / RestEurope	59.38	82.44	92.22	77.79	78.91	86.23	92.94	83.64	69.11
Stockholm	PM10 daily mean (ug/m3)	2.74	2.84	5.58	7.15	3.2	5.24	8.05	6.15	4.02
Stockholm	city	40.1	26.59	24.11	21.06	24.95	29.9	17.69	25.81	32.53
Stockholm	RestEurope	31.5	16.4	25.44	62.4	38.01	22.1	64.99	37.67	45.49
Stockholm	ExtraSource	28.4	57.01	50.44	16.54	37.04	48.01	17.32	36.51	21.98
Stockholm	Domestic country	58.67	39.02	46.49	62.71	37.23	49.94	48.62	37.85	58.19
Stockholm	City / Domestic country	67.99	67.75	55.11	32.99	67.53	59.97	37.87	67.14	56.02
Stockholm	Domestic country (without City) / RestEurope	64.04	78.28	84.78	70.21	56.42	89.72	49.29	32.87	59.12
Bern	PM10 daily mean (ug/m3)	13.02	13.19	18.88	18.08	14.84	14.28	12.59	11.3	11.01
Bern	city	40.14	12.98	8.02	14.98	31.19	27.46	28.92	23.57	28.71
Bern	RestEurope	55.53	70.38	73.73	72.85	56.68	58.85	56.7	69.65	64.44
Bern	ExtraSource	4.33	16.64	18.25	12.17	12.13	13.68	14.38	6.78	6.85
Bern	Domestic country	65.9	42.79	38.92	60.73	66.79	67.03	72.23	73.02	52.76
Bern	City / Domestic country	60.96	29.05	19.51	24.59	46.15	40.46	39.44	32.51	52.7
Bern	Domestic country (without City) / RestEurope	46.56	42.68	42.01	62.77	62.59	66.86	76.58	71.35	36.87
Zurich	PM10 daily mean (ug/m3)	16.25	21.07	21.27	21.1	21.48	19.04	23.37	19.4	15.66
Zurich	city	24.95	15.69	10.45	16.42	42.43	29.82	32.42	30.11	37.75
Zurich	RestEurope	70.84	61.71	69.88	72.09	44.37	51.96	51.38	60.02	55.5
Zurich	ExtraSource	4.22	22.6	19.66	11.49	13.19	18.22	16.2	9.87	6.74
Zurich	Domestic country	66.24	30.45	16.84	37.89	70.41	64.64	63.14	78.93	66.91
Zurich	City / Domestic country	39.22	52.4	62.02	43.95	58.54	46.06	52.49	38.31	54.61
Zurich	Domestic country (without City) / RestEurope	56.77	23.94	9.13	29.52	65.32	67.22	60.13	82.14	51.55
London	PM10 daily mean (ug/m3)	29.34	37.49	17.23	21.34	31.57	32.91	22.82	19.5	23.59
London	city	14.87	18.39	13.24	9.71	17.22	18.09	9.29	10.53	9.14
London	RestEurope	61.61	61.35	30.35	51.99	63.51	69.97	77.81	67.56	77.96
London	ExtraSource	23.51	20.26	56.41	38.3	19.27	11.94	12.9	21.91	12.89
London	Domestic country	62.45	75.15	29.26	13.46	23.76	29.2	16.2	24.88	20.3
London	City / Domestic country	24.11	24.07	52.33	71.99	74.29	60.27	56.75	43.91	44.73
London	Domestic country (without City) / RestEurope	76.21	92.57	48.36	7.37	10.11	15.99	8.92	23.13	14.69
