# Supplementary material for: Prediction of source contributions to urban background PM 10 concentrations in European cities: a case study for an episode in December 2016 using EMEP/MSC-W rv4.15 – Part 2: The city contribution
Source: Copernicus journal article supplement (doi:10.5194/gmd-14-4143-2021), 2021-07-01
Supplement: Supplementary file 2 [file gmd-14-4143-2021-supplement.zip › supplement.docx]

**Supplement.**

| 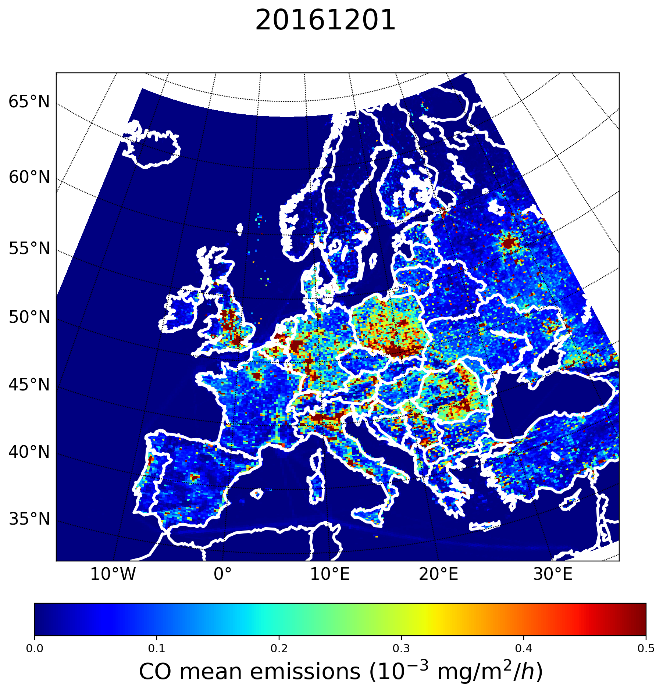 | 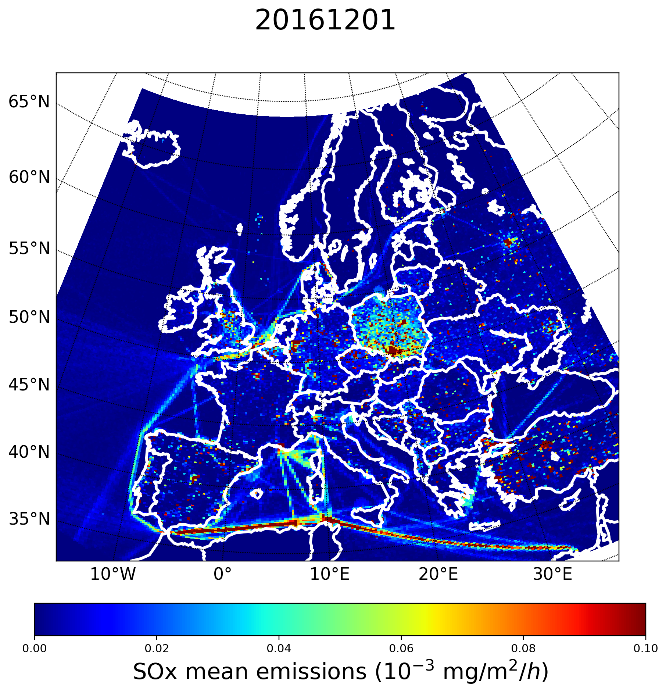 |
| --- | --- |
| 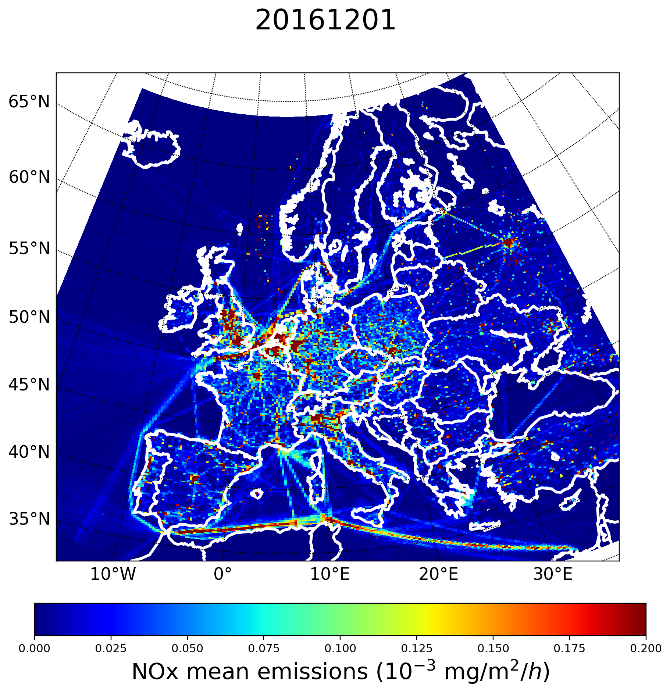 | 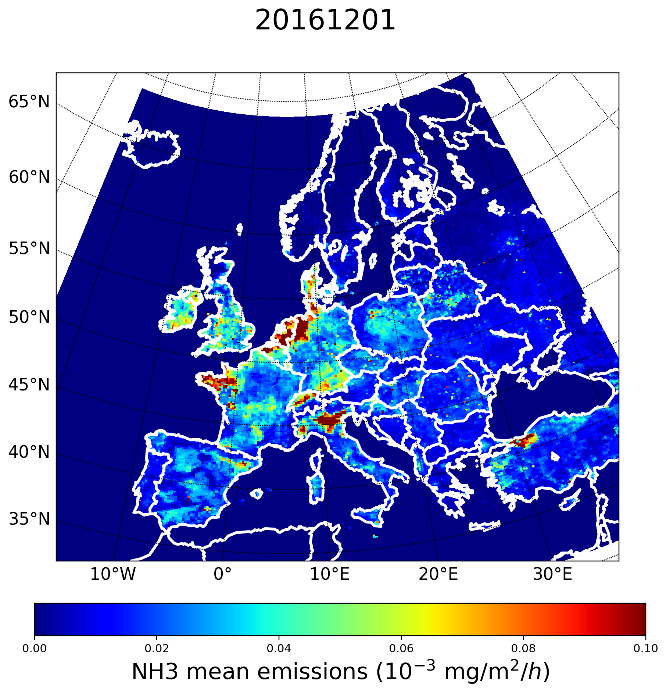 |
| 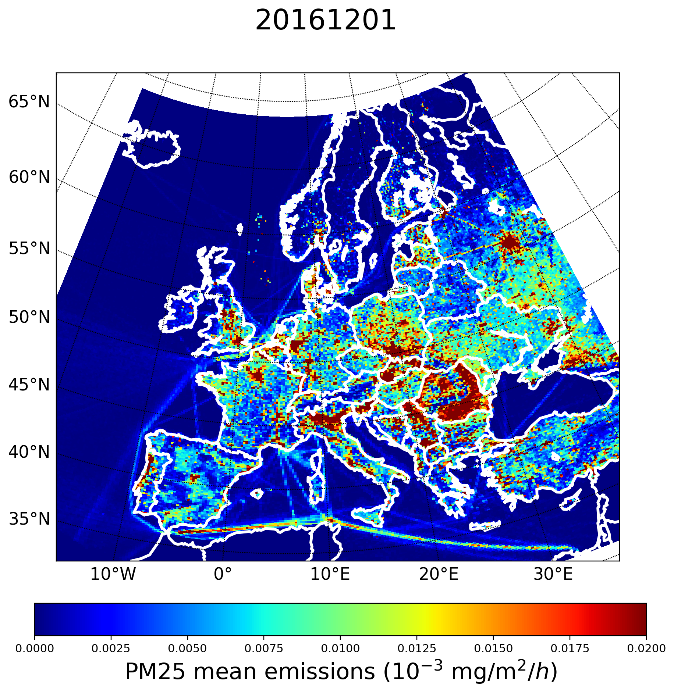 | 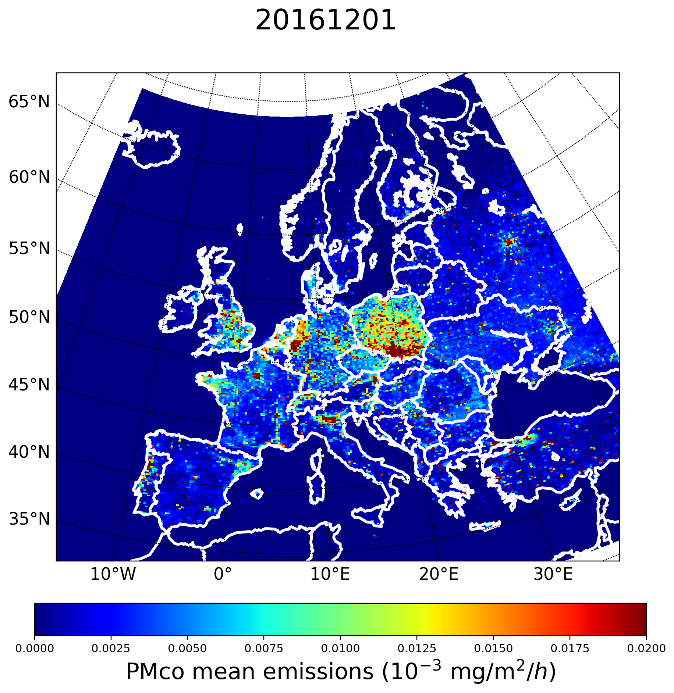 |
| 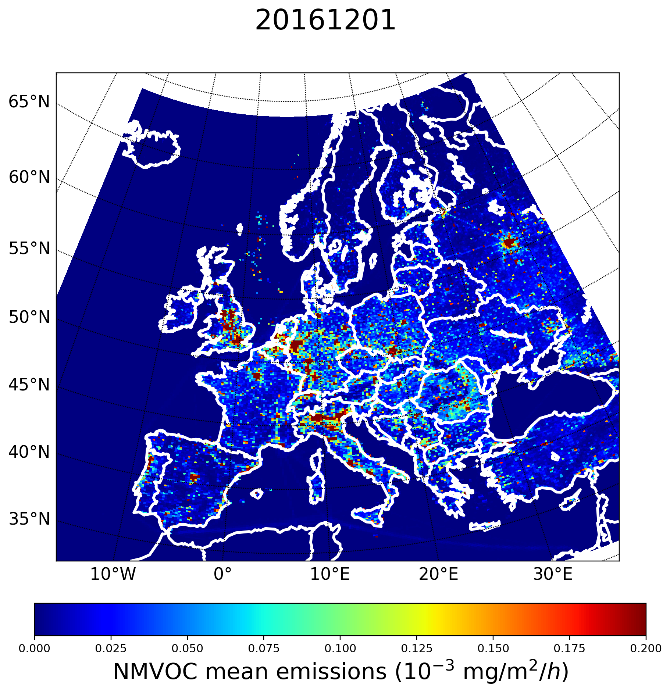 |  |

**Fig. S1.** Daily mean distribution of the anthropogenic emissions of CO, SOx, NOx, NH3, fine primary particulate matter (denoted as PM2.5), coarse primary particulate matter (denoted as PMco) and NMVOC as used in the EMEP model for the reference run on 01 December 2016.

| 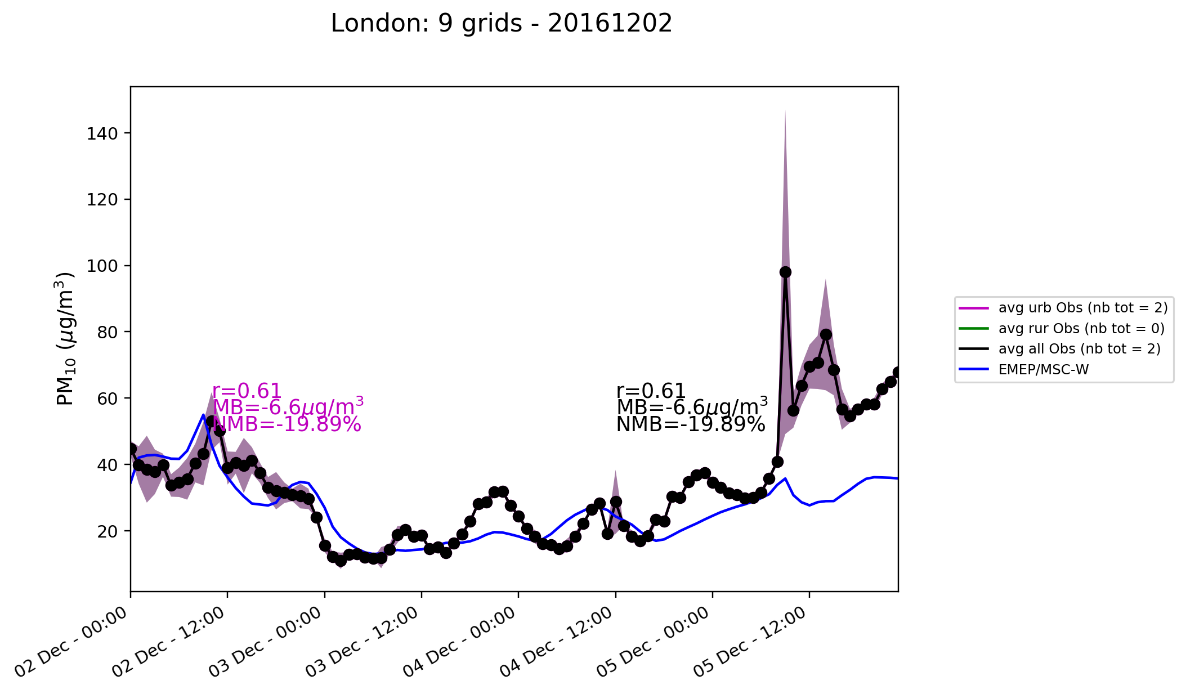 |
| --- |
| 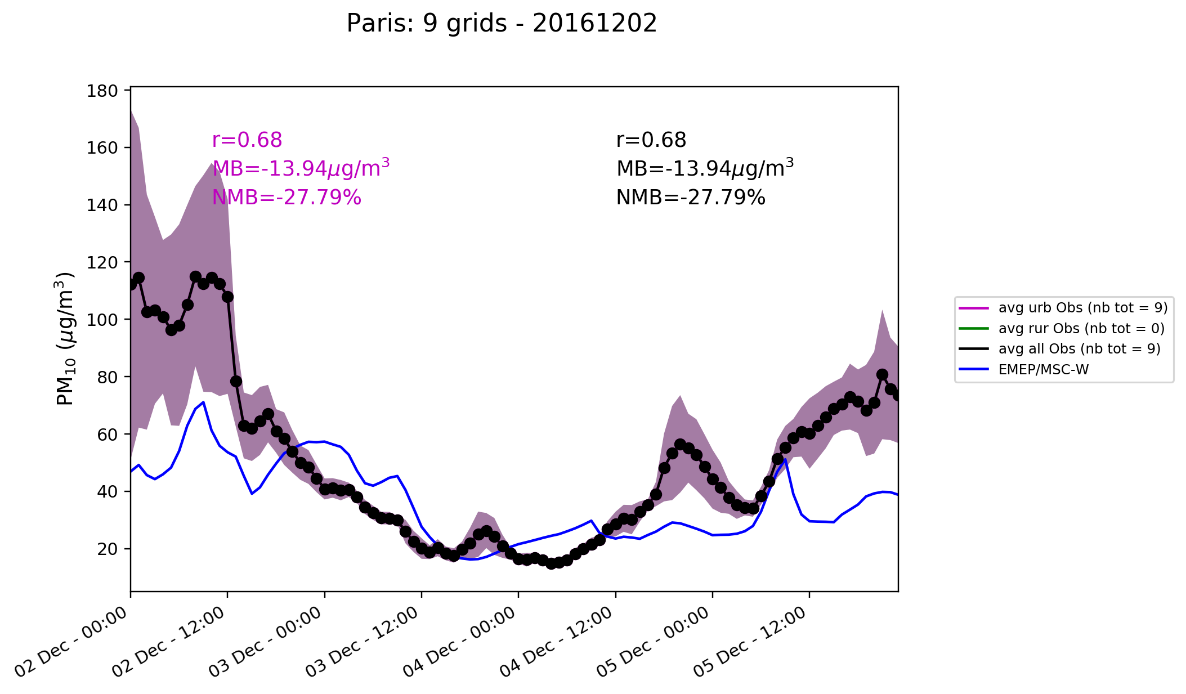 |
| 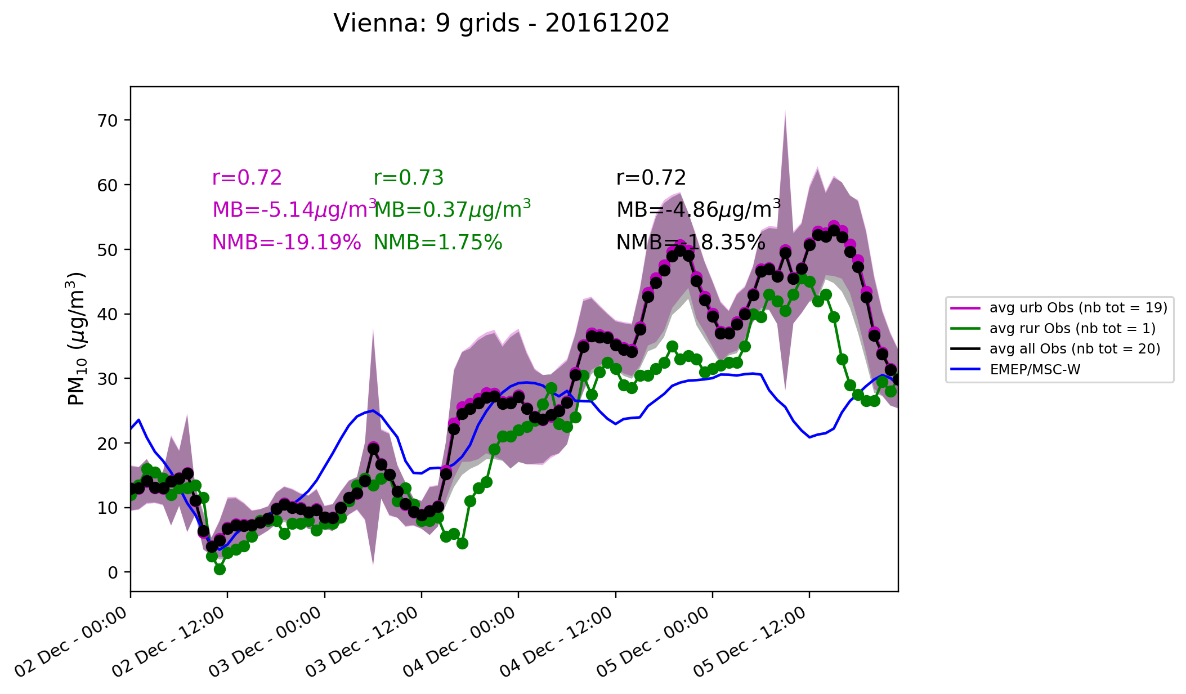 |
| 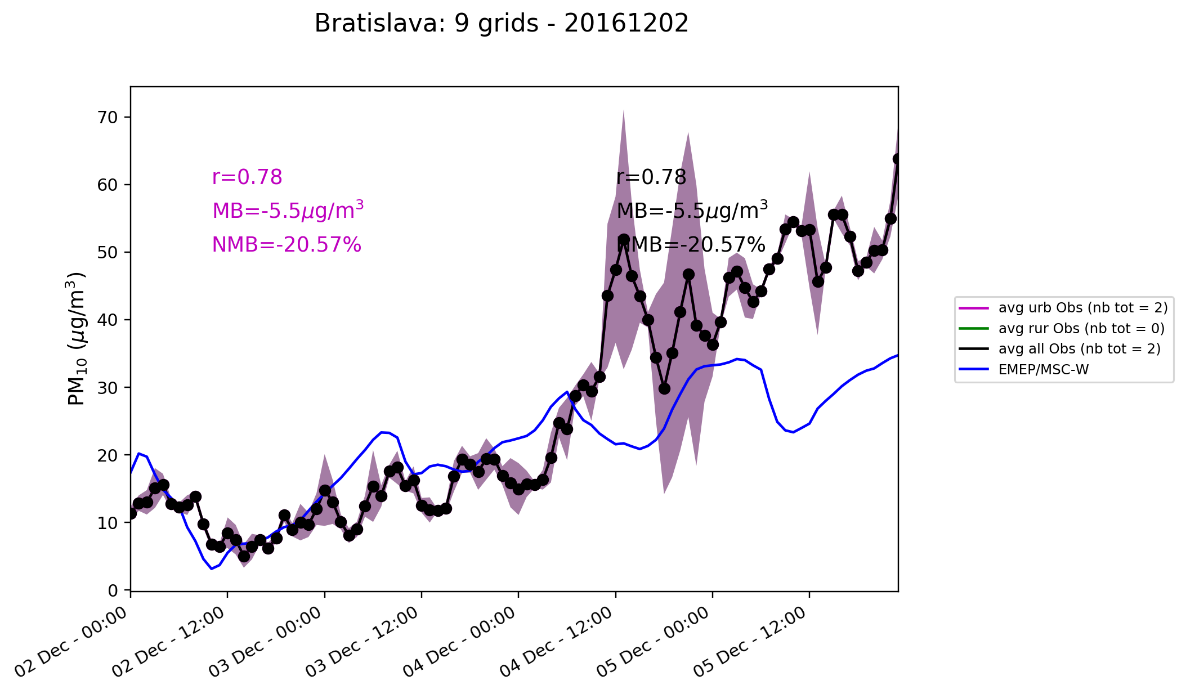 |
| 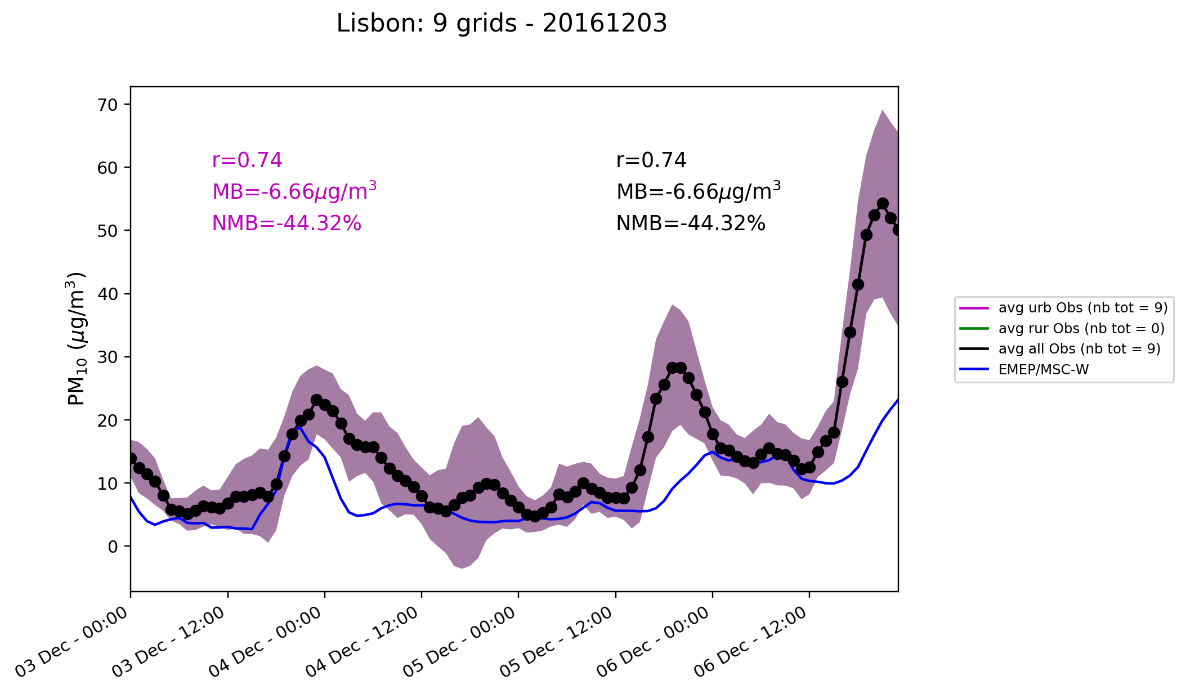 |
| 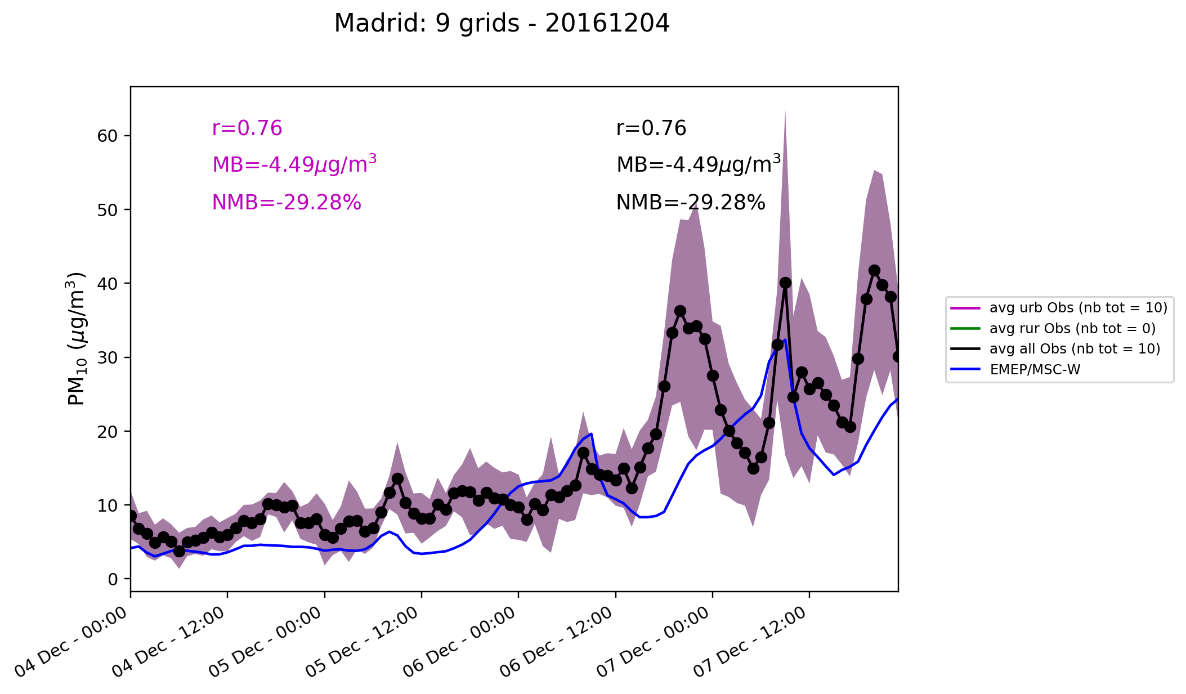 |
| 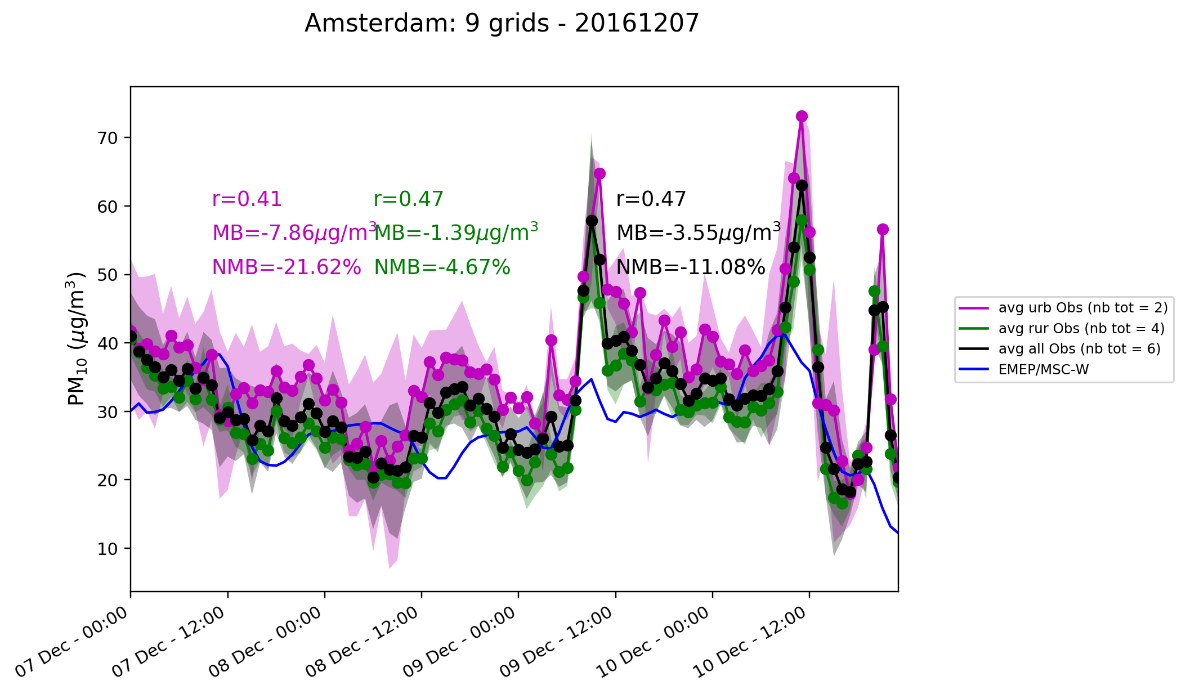 |
| 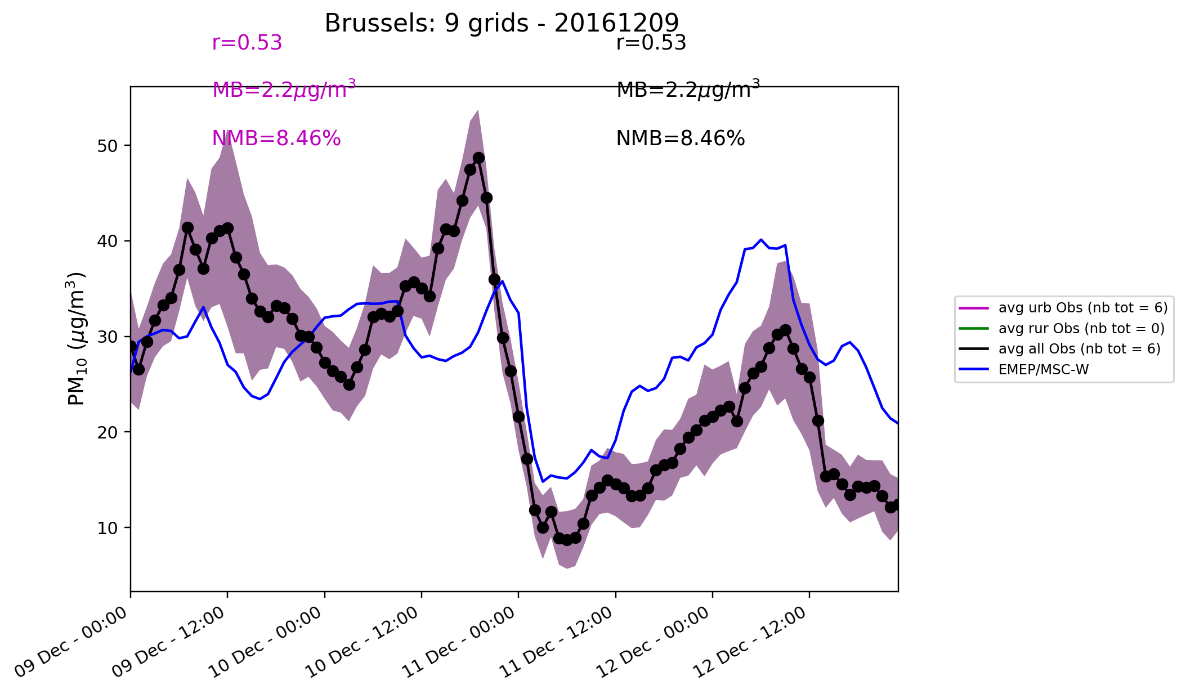 |

**Fig S2** Hourly averaged PM10 concentrations (in µg/m3) measured by the AirBase stations for several examples. The cities are defined by an area using 9 grid cells. The mean of all the stations is plotted in black, the urban stations are plotted in magenta and the rural stations in green. The coloured shade error corresponds to the standard deviation. The number of maximum of stations available during the period is provided. The EMEP model concentrations are plotted in blue. The correlation coefficient, the mean bias and the normalised mean bias for these 4-day forecasts are provided. The mean bias is calculated as MB = , and the normalised mean bias as NMB = , with M referring to the model, O to the observations and N is the number of observations. The examples are for London, Paris, Vienna, Bratislava for predictions from 02 to 05 December 2016; Lisbon for predictions from 03 to 06 December 2016; Madrid for predictions from 04 to 07 December 2016, Amsterdam for predictions from 07 to 10 December 2016; and Brussels for predictions from 09 to 12 December 2016.

| 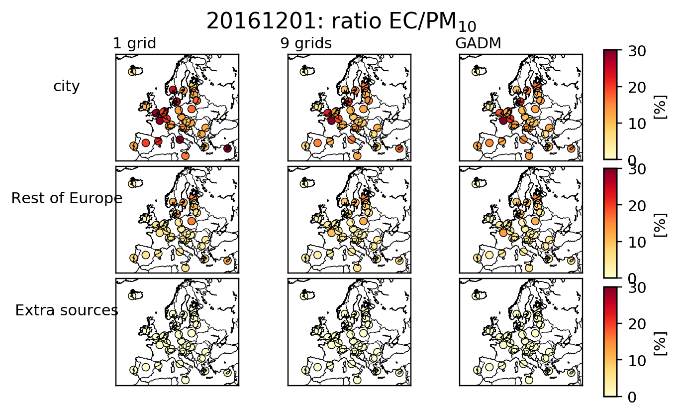 | 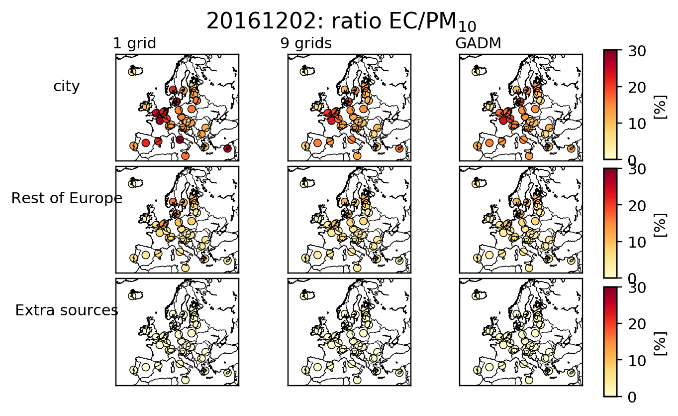 |
| --- | --- |
| 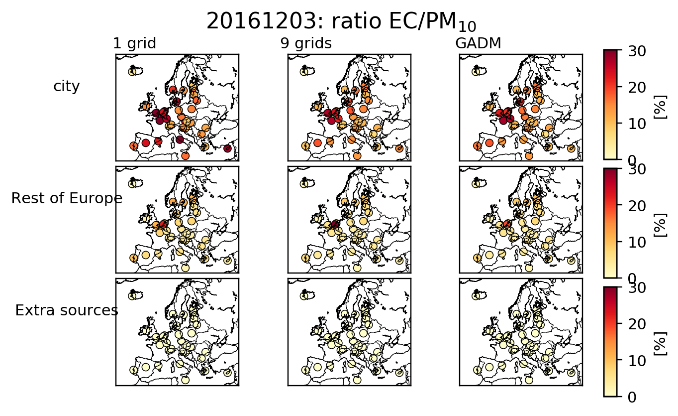 | 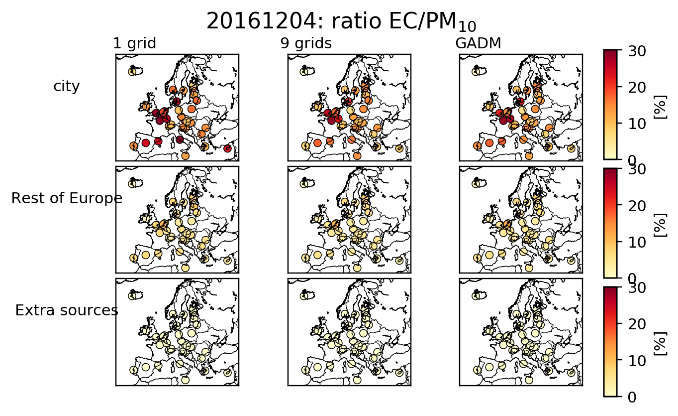 |
| 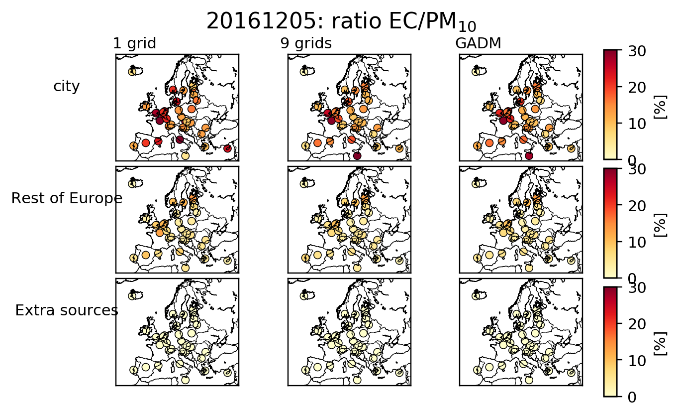 | 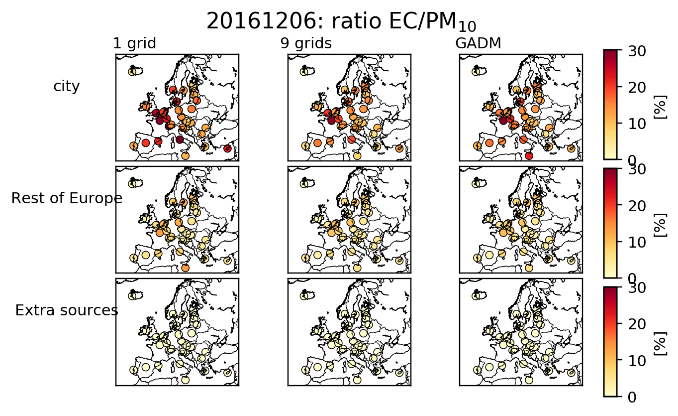 |
| 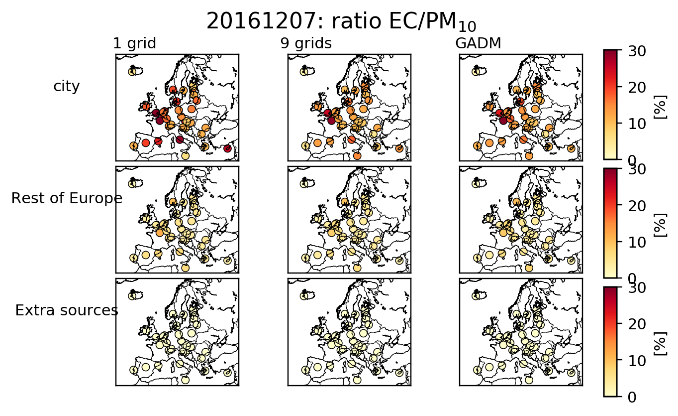 | 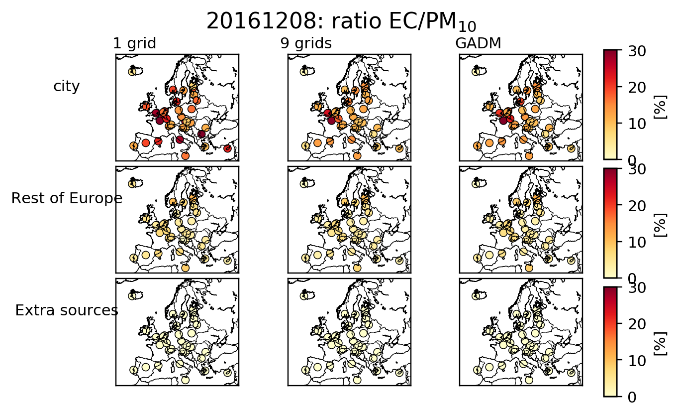 |
| 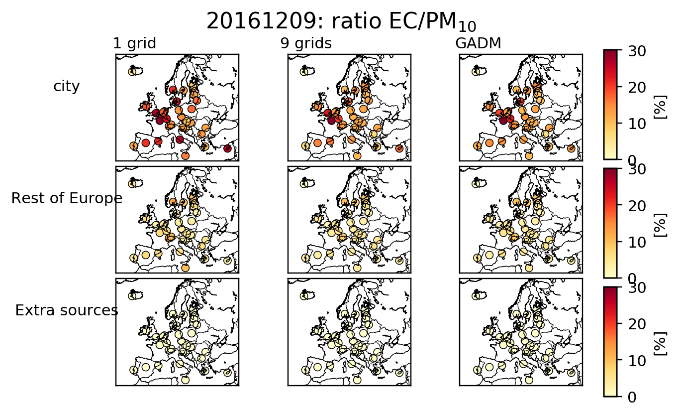 |  |

**Fig. S3** Mean EC/PM10 ratio in percent for each individual forecasted day (from 01 December to 09 December 2016) over each city and for three city definitions (1 grid cell, 9 grid cells and GADM) and for the City, Rest of Europe and Extra Sources contributions. The results shown are for the 15% perturbation runs.

| 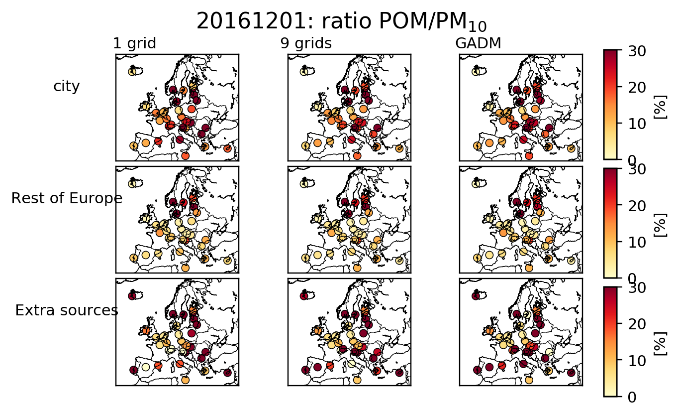 | 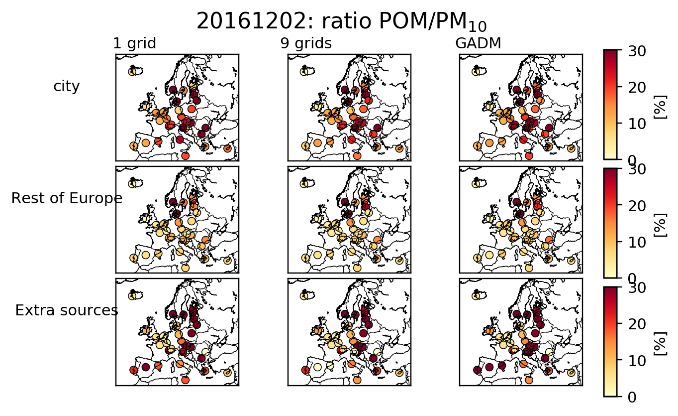 |
| --- | --- |
| 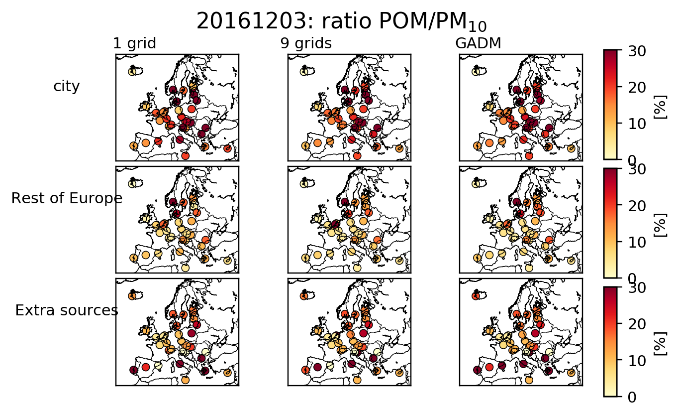 | 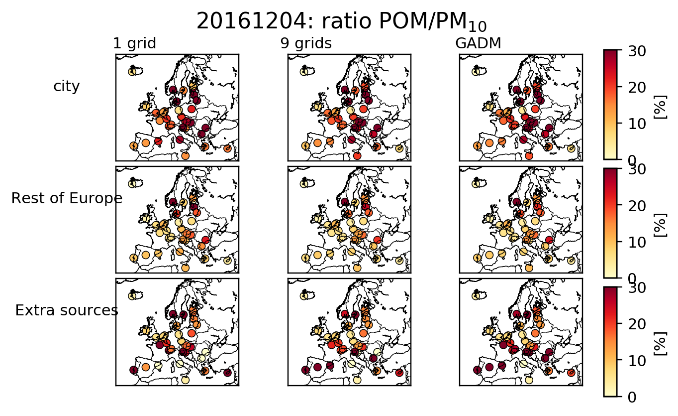 |
| 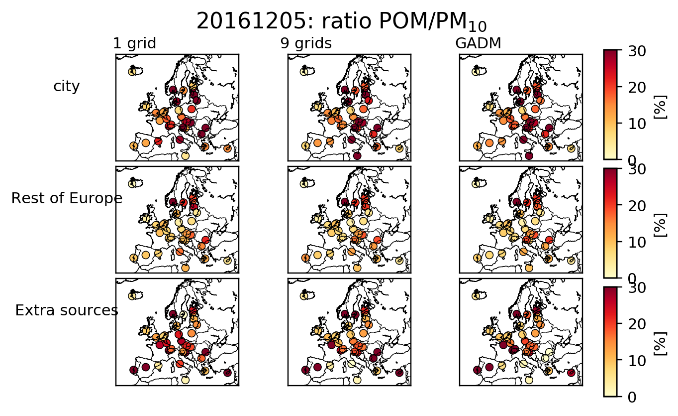 | 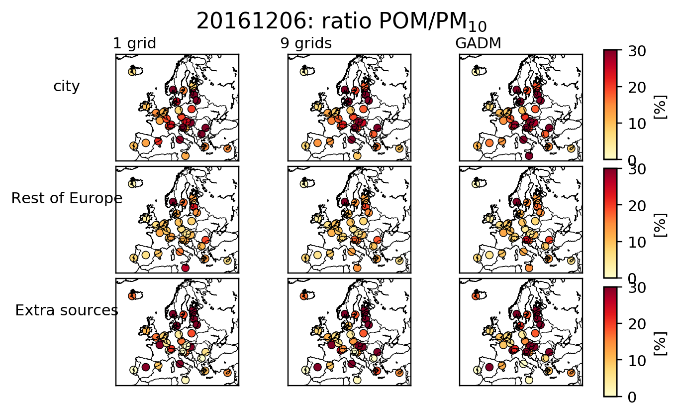 |
| 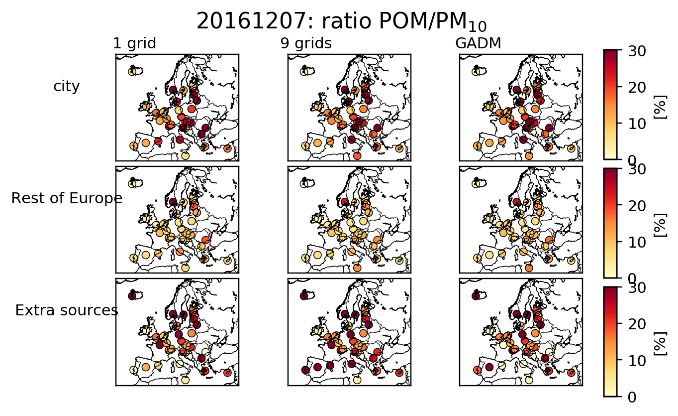 | 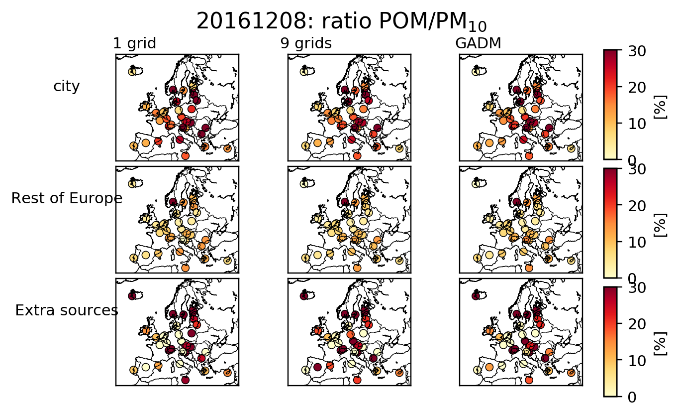 |
| 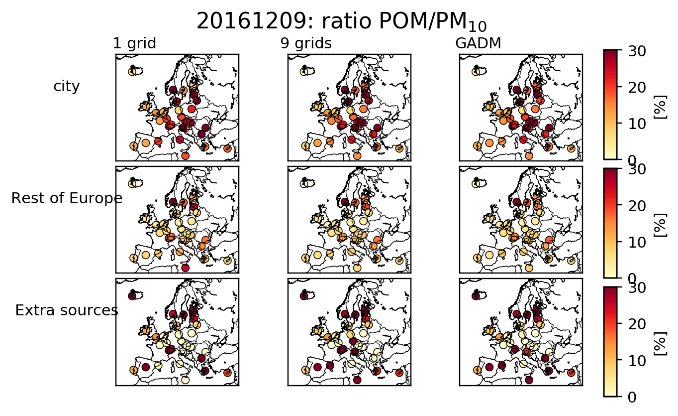 |  |

**Fig. S4** Mean POM/PM10 ratio in percent for each individual forecasted day (from 01 December to 09 December 2016) over each city and for three city definitions (1 grid cell, 9 grid cells and GADM) and for the City, Rest of Europe and Extra Sources contributions. The results shown are for the 15% perturbation runs.

| 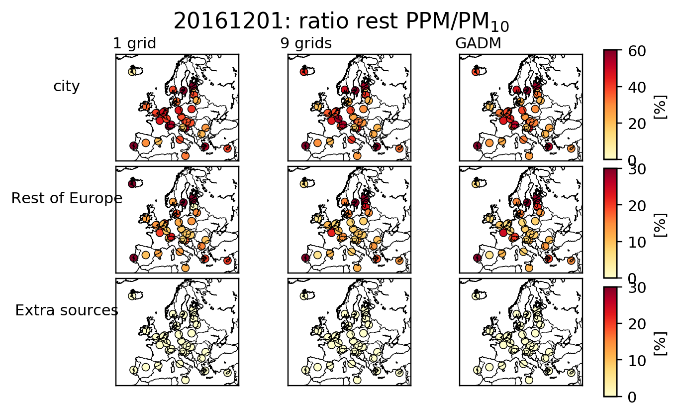 | 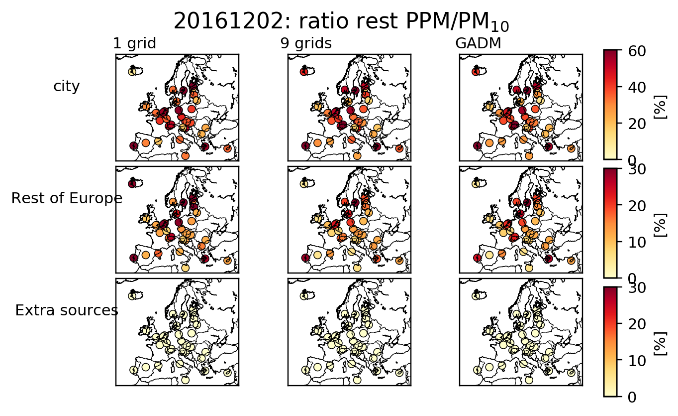 |
| --- | --- |
| 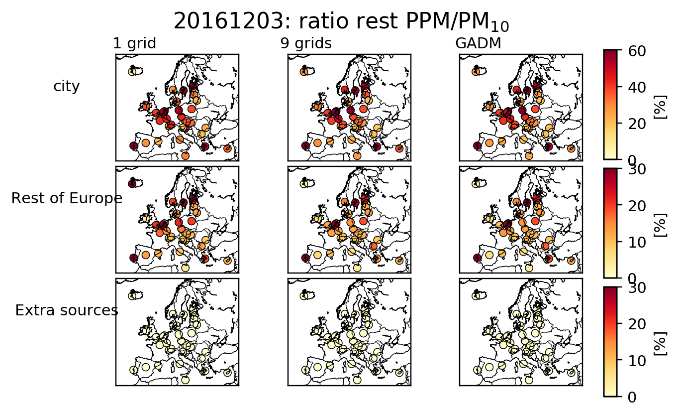 | 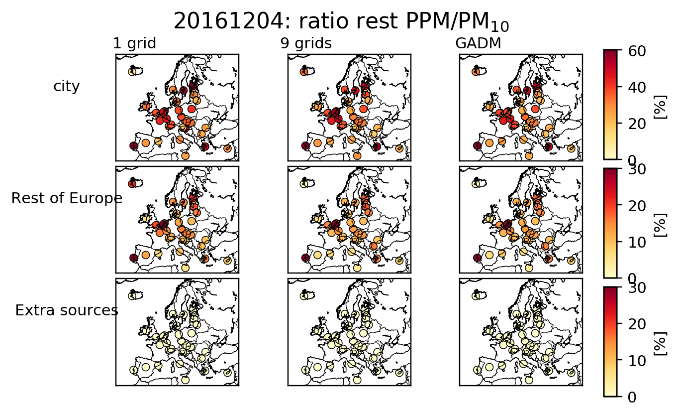 |
| 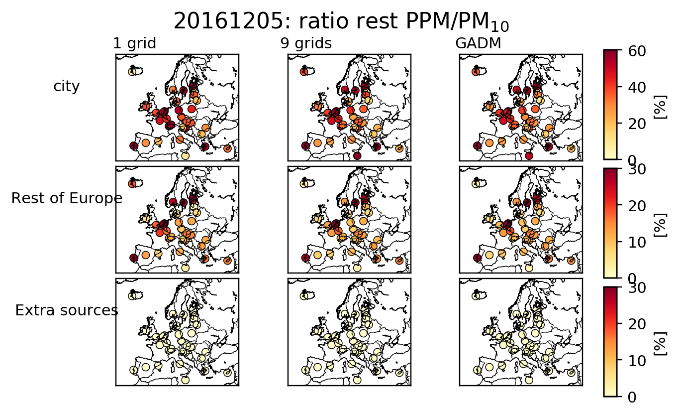 | 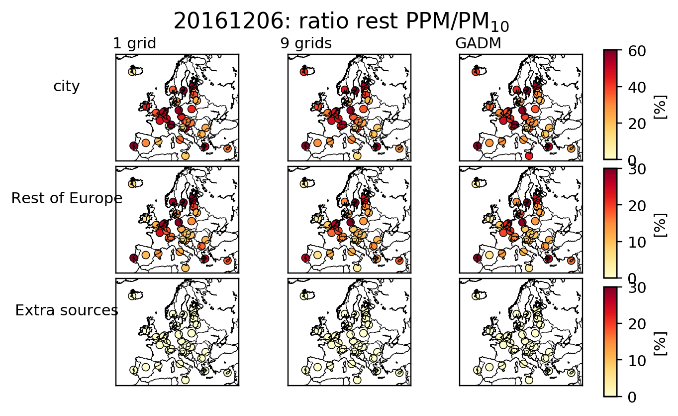 |
| 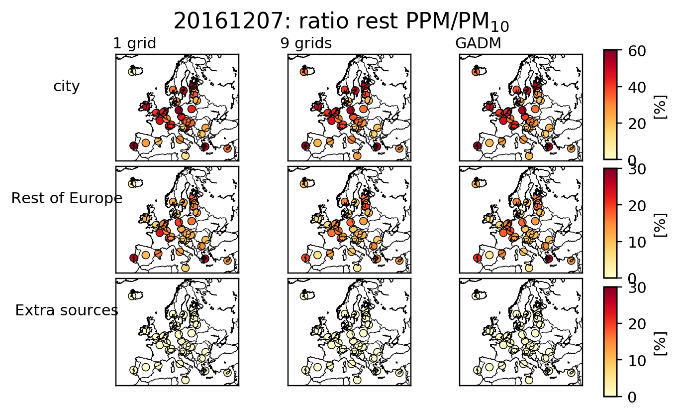 | 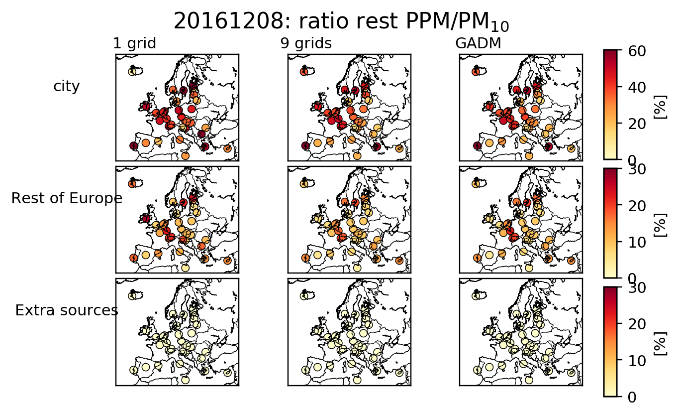 |
| 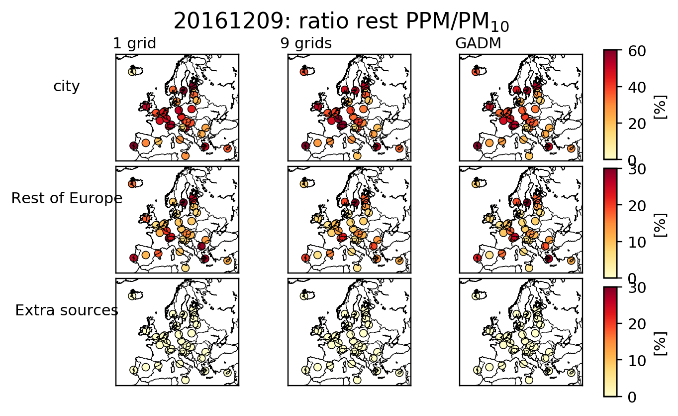 |  |

**Fig. S5** Mean rest PPM/PM10 ratio in percent for each individual forecasted day (from 01 December to 09 December 2016) over each city and for three city definitions (1 grid cell, 9 grid cells and GADM) and for the City, Rest of Europe and Extra Sources contributions. The results shown are for the 15% perturbation runs. Note the different colour scale for the city contribution.

| 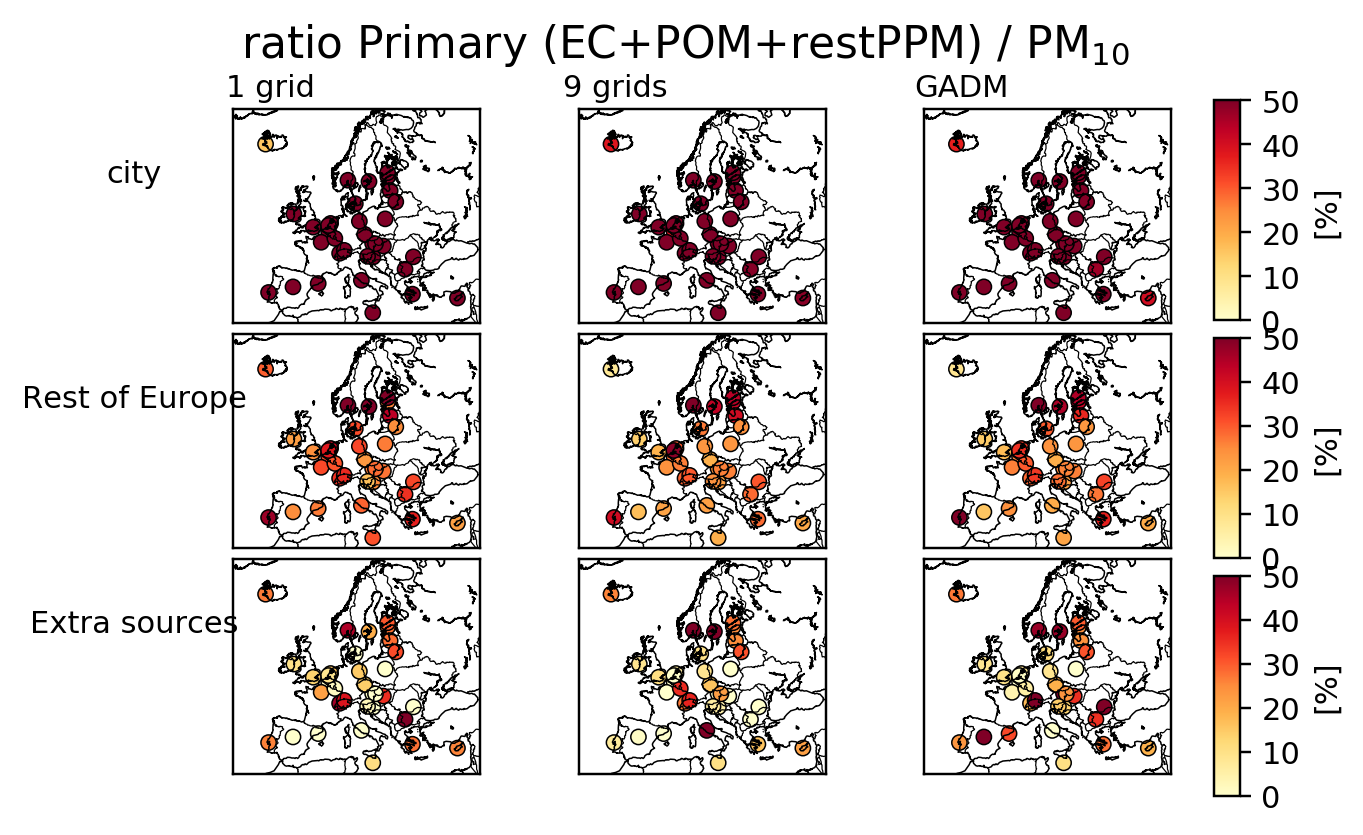 |
| --- |

**Fig. S6** Mean Primary aerosols/PM10 ratio in percent over the studied cities for three city definitions (1 grid cell, 9 grid cells and GADM) for all predicted PM10 concentrations (for all 4-day forecasts) and for the City, Rest of Europe and Extra Sources contributions, based on the calculations performed by the 15% perturbation runs.

| 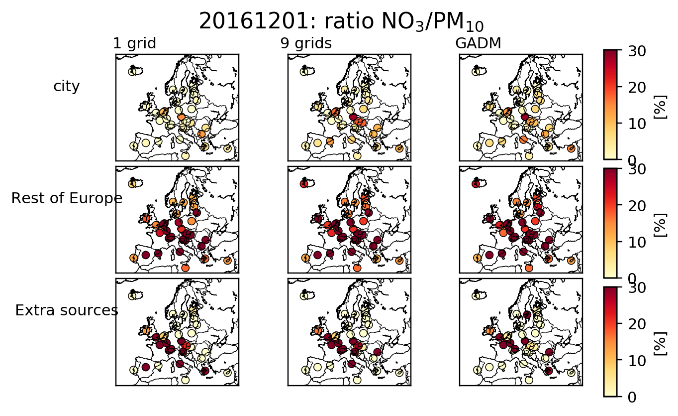 | 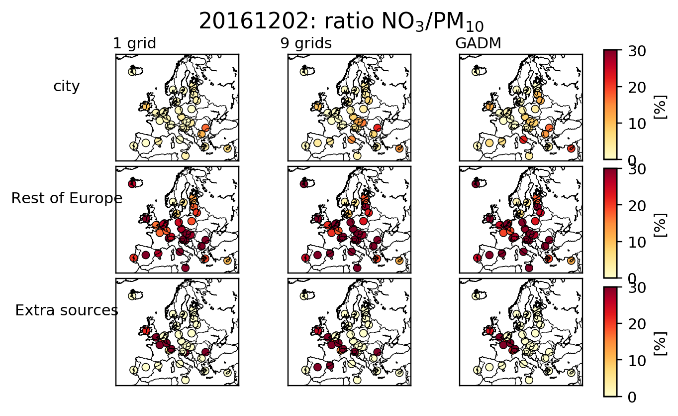 |
| --- | --- |
| 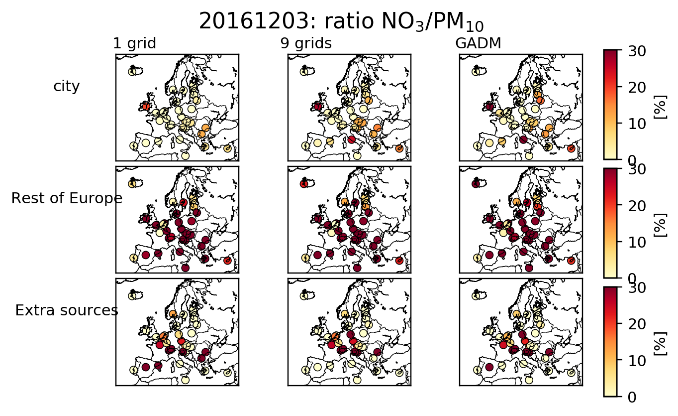 | 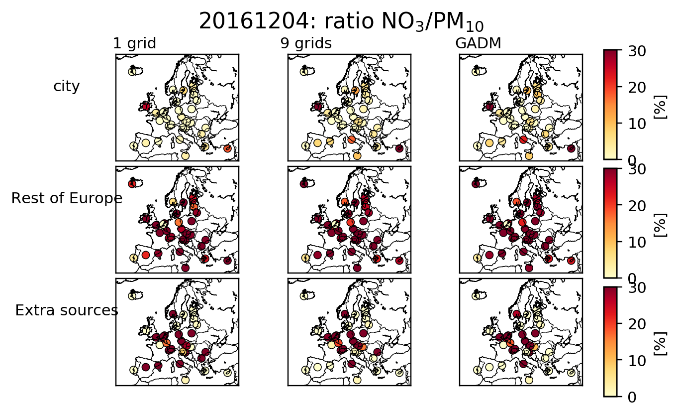 |
| 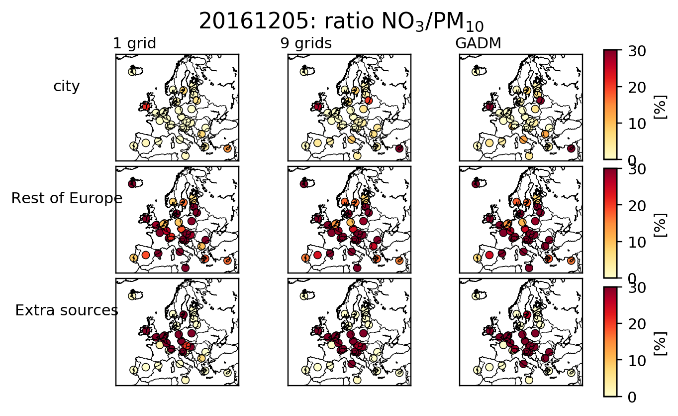 | 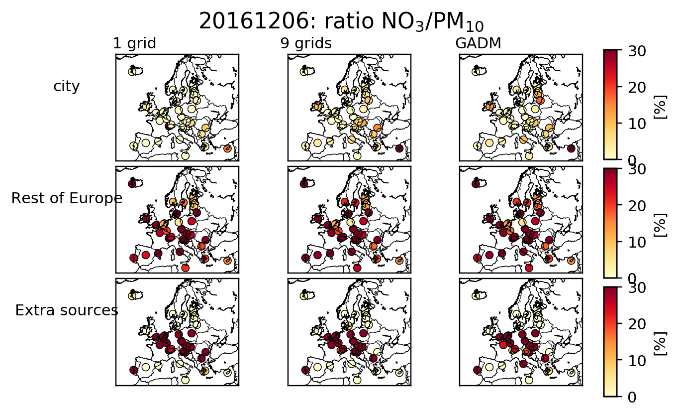 |
| 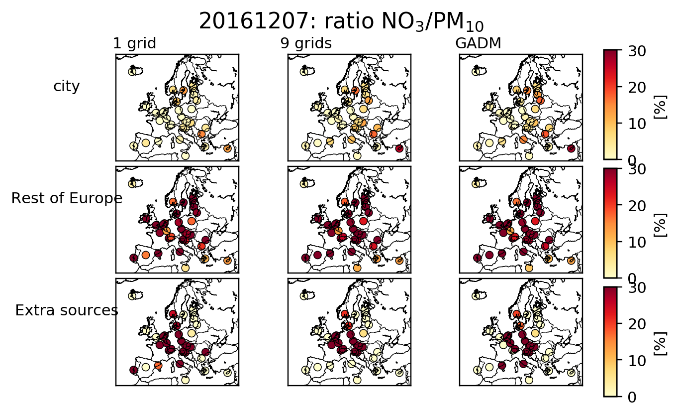 | 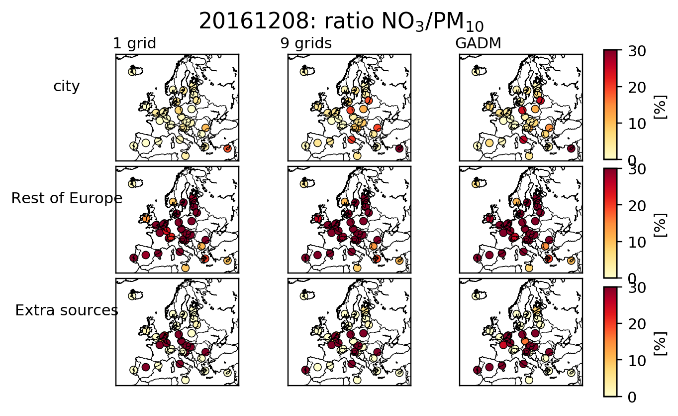 |
| 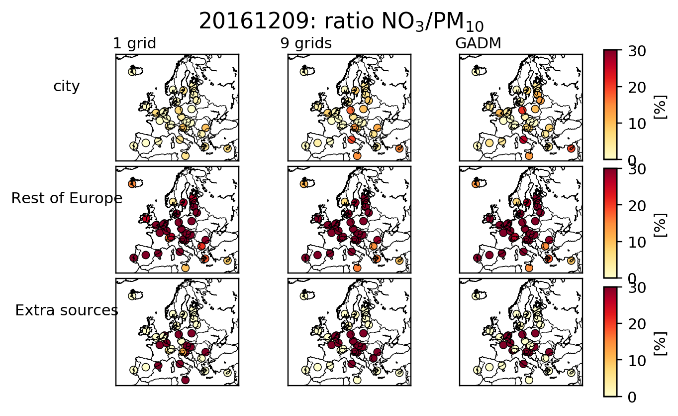 |  |

**Fig. S7** Mean NO3/PM10 ratio in percent for each individual forecasted day (from 01 December to 09 December 2016) over each city and for three city definitions (1 grid cell, 9 grid cells and GADM) and for the City, Rest of Europe and Extra Sources contributions. The results shown are for the 15% perturbation runs.

| 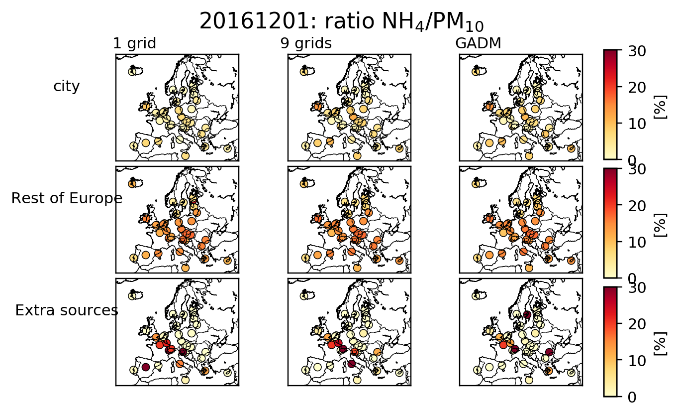 | 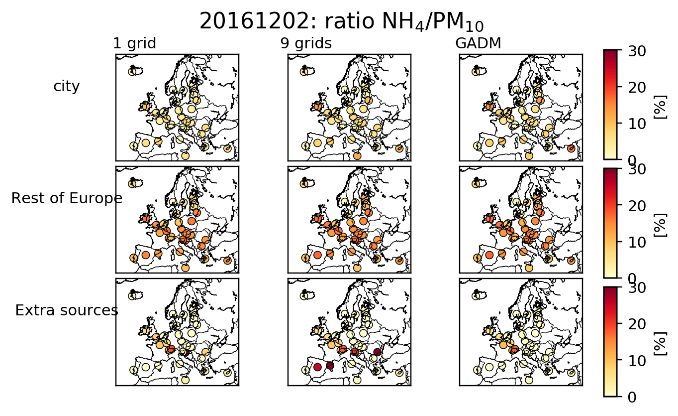 |
| --- | --- |
| 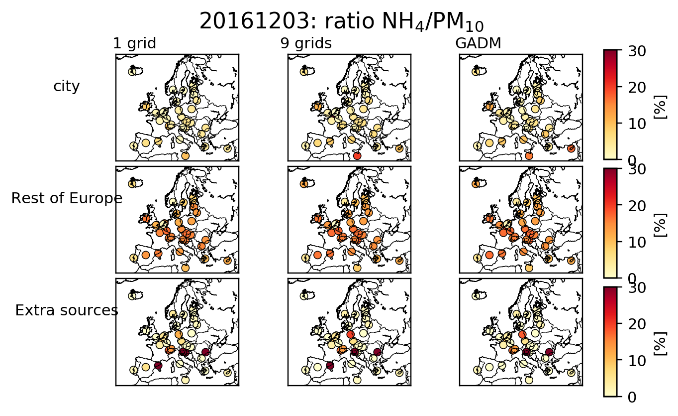 | 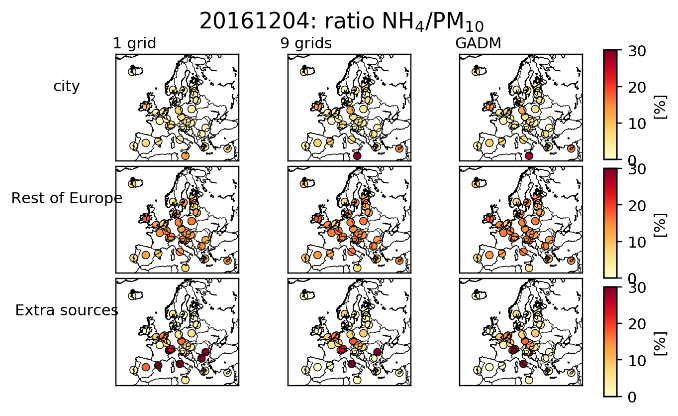 |
| 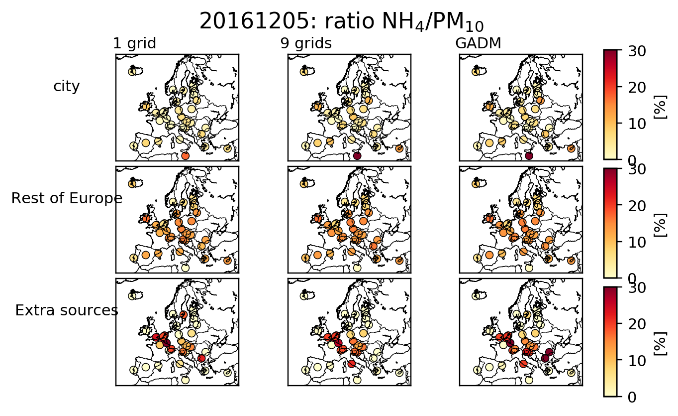 | 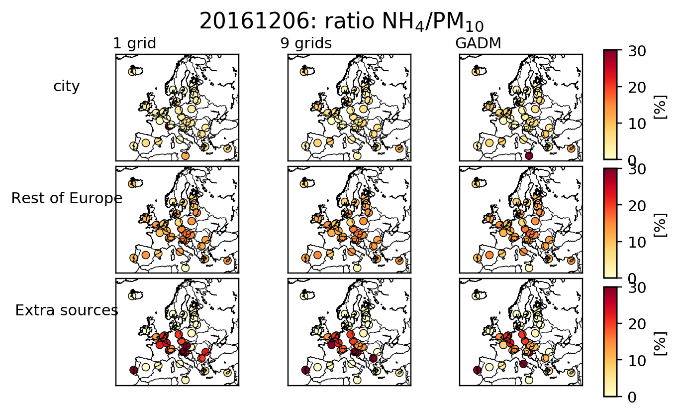 |
| 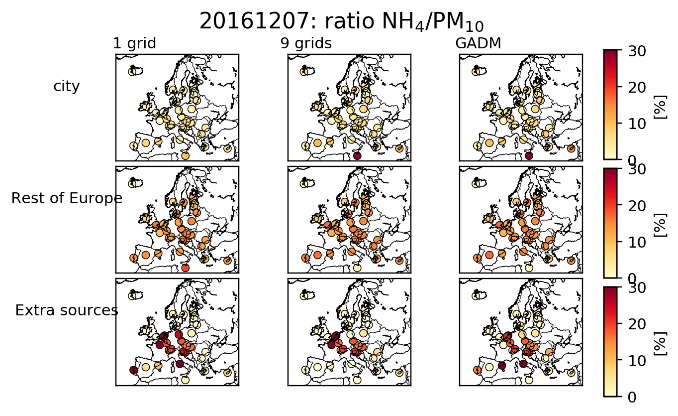 | 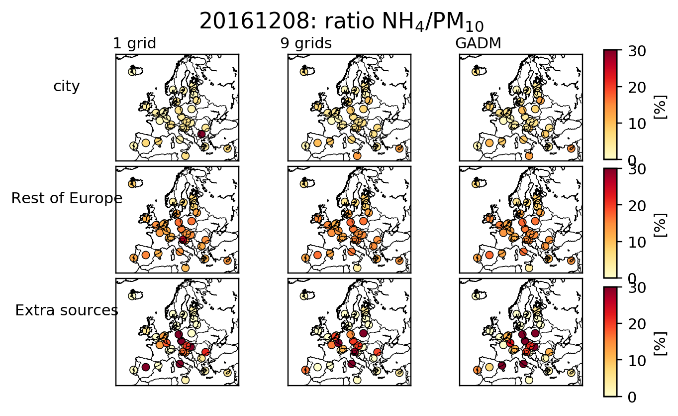 |
| 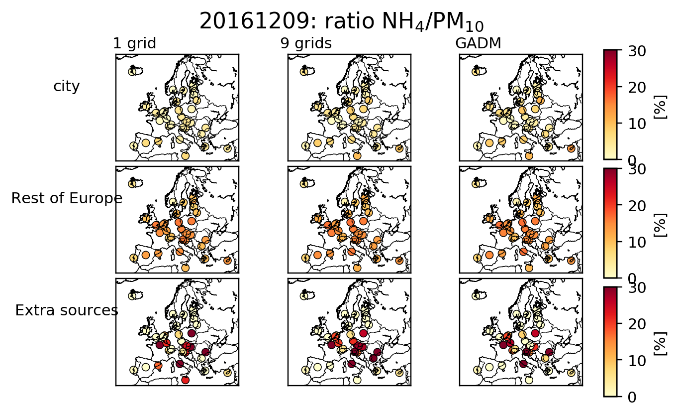 |  |

**Fig. S8** Mean NH4/PM10 ratio in percent for each individual forecasted day (from 01 December to 09 December 2016) over each city and for three city definitions (1 grid cell, 9 grid cells and GADM) and for the City, Rest of Europe and Extra Sources contributions. The results shown are for the 15% perturbation runs.

| 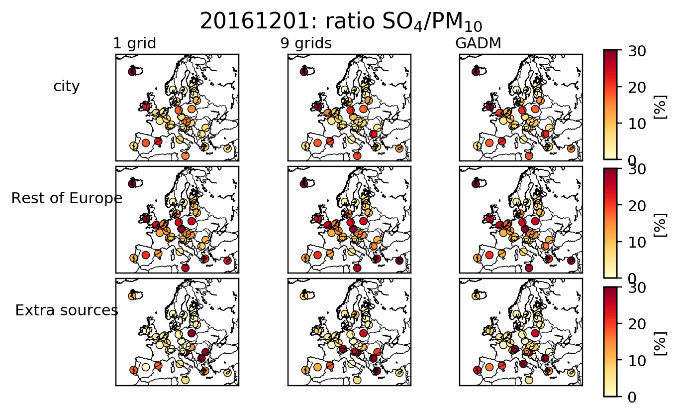 | 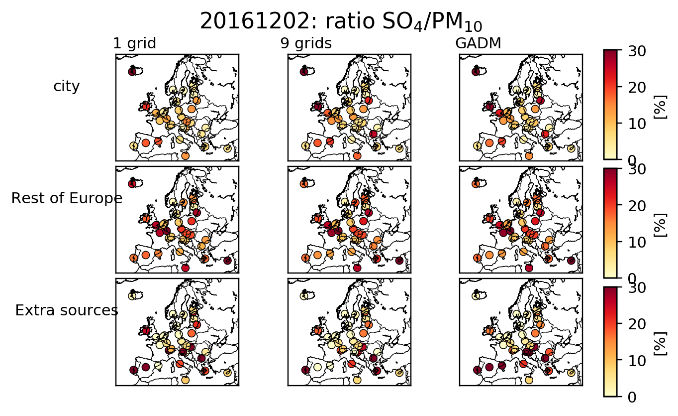 |
| --- | --- |
| 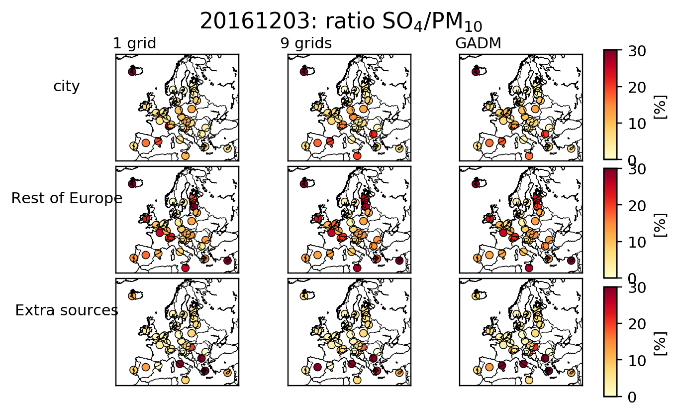 | 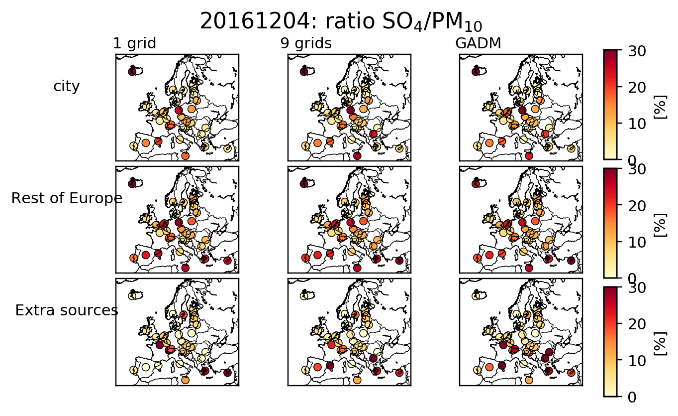 |
| 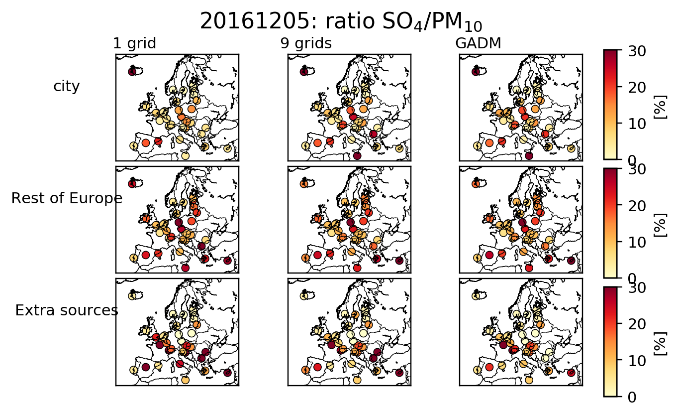 | 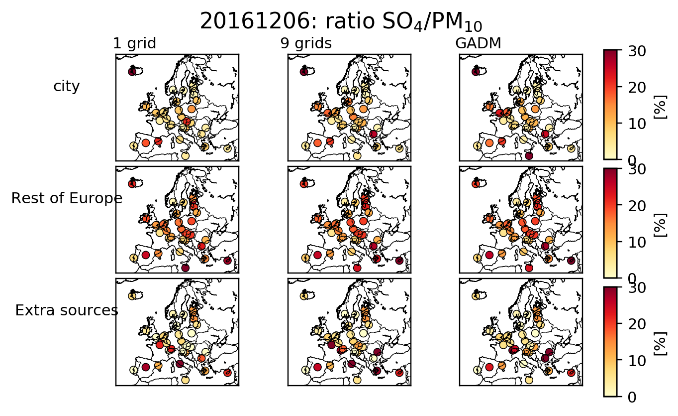 |
| 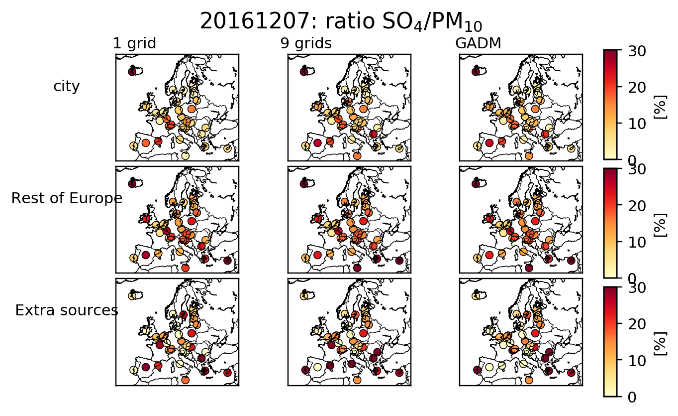 | 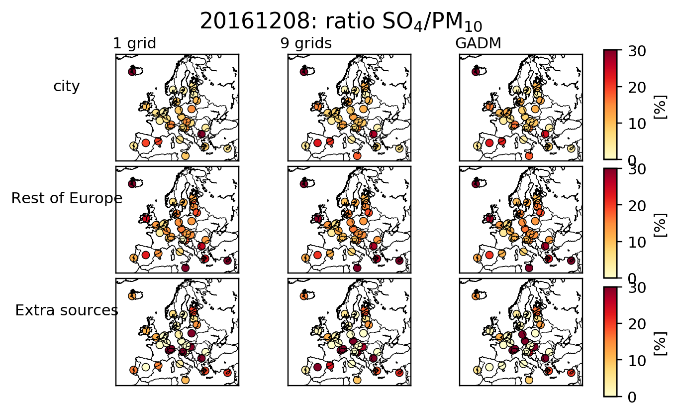 |
| 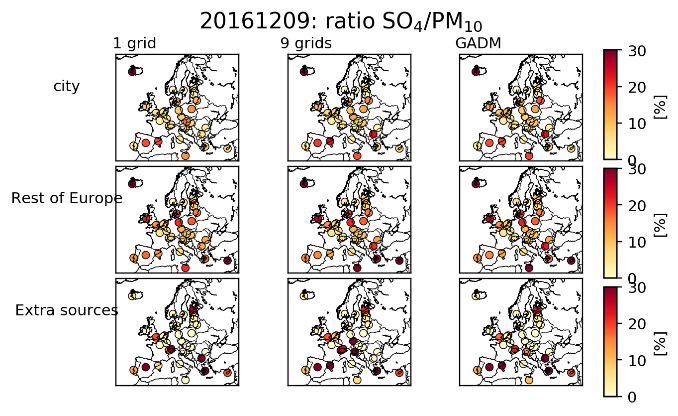 |  |

**Fig. S9** Mean SO4/PM10 ratio in percent for each individual forecasted day (from 01 December to 09 December 2016) over each city and for three city definitions (1 grid cell, 9 grid cells and GADM) and for the City, Rest of Europe and Extra Sources contributions. The results shown are for the 15% perturbation runs.

| 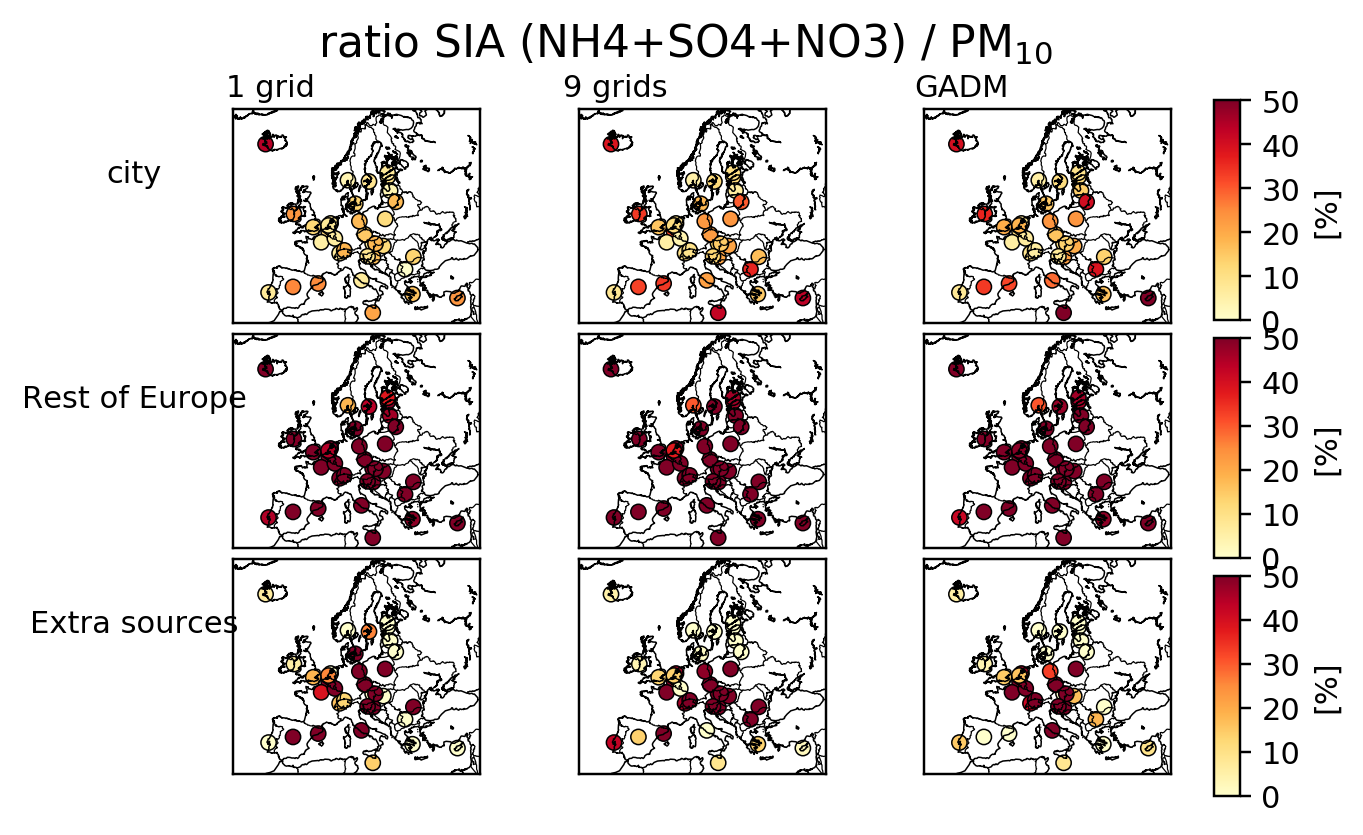 |
| --- |

**Fig. S10** Mean SIA/PM10 ratio in percent over the studied cities for three city definitions (1 grid cell, 9 grid cells and GADM) for all predicted PM10 concentrations (for all 4-day forecasts), and for the City, Rest of Europe and Extra Sources contributions, based on the calculations performed by the 15% perturbation runs.

**Table S1.** Input meteorological data used in the EMEP Model.

| **Parameter** | **Unit** | **Description** |
| --- | --- | --- |
| **3D fields** | | **for 𝜎 levels** |
| u,v | *m/s* | Horizontal wind velocity components |
| q | *kg/kg* | Specific humidity |
| 𝜃 | *𝐾* | Potential temperature |
| CW | *𝑘𝑔/𝑘𝑔* | Cloud water |
| CL | *%* | 3D Cloud cover |
| cnvuf | *𝑘𝑔/𝑠𝑚2* | Convective updraft flux |
| cnvdf | *𝑘𝑔/𝑠𝑚2* | Convective downdraft flux |
| PR | *mm* | Precipitation |
| **2D fields** | | **for surface** |
| PS | *hPa* | Surface pressure |
| T2 | *K* | Temperature at 2 m height |
| RH2 | *%* | Relative humidity at 2 m height |
| SR | *𝑊/𝑚2* | Surface flux of sensible heat |
| 𝜏 | *𝑁/𝑚2* | Surface stress |
| SST | *K* | Sea Surface Temperature |
| SWC | *𝑚3/𝑚3* | Soil water content |
| lspr | *m* | Large scale precipitation |
| cpr | *m* | Convective precipitation |
| sdepth | *m* | Snow depth |
| ice | *%* | Fraction of ice |
| SMI1 |  | Soil moisture index level 1 |
| SMI3 |  | Soil moisture index level 3 |
| u10, v10 | *m/s* | Wind at 10 m height |

**Table S2.** Correlation coefficient, bias and normalised mean bias between the observations and the corresponding EMEP model value, for the wind speed at 10 m, relative humidity at 2m and the temperature at 2m, using each individual day between 01 and 09 December 2016. The mean bias is calculated as MB = , and the normalised mean bias as NMB = , with M referring to the model, O to the observations and N is the number of observations. The numbers in square brackets correspond to the numbers of stations available within the area of 9 grid cells used to define each city. The numbers in parentheses below the correlation coefficients are the numbers of hourly observations available during the period. If some stations are located in a same model grid, the hourly observations of these stations are averaged before to be compared to the model.

| **City** | **wind speed at 10 m** | | | **relative humidity at 2 m** | | | **temperature at 2 m** | | |
| --- | --- | --- | --- | --- | --- | --- | --- | --- | --- |
| **r** | **bias (m/s)** | **NMB**  **(%)** | **r** | **bias**  **(%)** | **NMB (%)** | **r** | **bias**  **(K)** | **NMB (%)** |
| Amsterdam [1] | 0.91 (216) | 0.03 | 0.8 | 0.65 (216) | -0.16 | -0.19 | 0.95 (216) | -0.55 | -0.2 |
| Athens [5] | 0.83 (574) | 0.5 | 16.27 | 0.77 (572) | 7.02 | 10.77 | 0.85 (574) | -1.4 | -0.49 |
| Barcelona [2] | 0.69 (422) | 0.39 | 12.56 | 0.8 (422) | 0.22 | 0.27 | 0.89 (422) | 0.3 | 0.11 |
| Berlin [1] | 0.95 (216) | -0.23 | -5.53 | 0.78 (216) | -2.97 | -3.36 | 0.98 (216) | -0.27 | -0.1 |
| Bern [5] | 0.25 (1069) | 0.13 | 11.52 | 0.49 (1066) | -23.68 | -28.32 | 0.65 (1066) | 0.78 | 0.29 |
| Bratislava [3] | 0.78 (424) | 0.71 | 21.62 | 0.5 (541) | -5.51 | -6.73 | 0.81 (541) | 0.1 | 0.04 |
| Brussels [4] | 0.78 (758) | 0.74 | 28.94 | 0.5 (604) | -2.51 | -2.85 | 0.93  (793) | -0.25 | -0.09 |
| Bucharest [3] | 0.72 (643) | 0.91 | 36.89 | 0.7 (647) | -0.71 | -0.97 | 0.93 (647) | -0.73 | -0.27 |
| Budapest [2] | 0.91 (216) | -0.16 | -4.63 | 0.72 (216) | -4.06 | -4.9 | 0.91 (216) | -0.04 | -0.01 |
| Copenhagen [4] | 0.88 (854) | 0.62 | 10.79 | 0.79 (854) | -1.4 | -1.58 | 0.92 (854) | 0.05 | 0.02 |
| Dublin [2] | 0.81 (432) | -0.55 | -13.29 | 0.67 (432) | 2.07 | 2.37 | 0.93 (432) | -0.4 | -0.14 |
| Helsinki [6] | 0.92 (859) | -0.18 | -2.84 | 0.81 (1079) | -3.32 | -3.78 | 0.96 (1079) | 0.16 | 0.06 |
| Lisbon [6] | 0.69 (306) | 0.42 | 12.96 | 0.82 (306) | -1.6 | -1.81 | 0.84 (306) | 0.28 | 0.1 |
| Ljubljana [2] | 0.01 (160) | -0.31 | -29.58 | 0.66 (215) | -4.2 | -5.22 | 0.82 (233) | -0.3 | -0.11 |
| London [4] | 0.8 (556) | -0.06 | -1.63 | 0.81 (553) | 5.17 | 6.02 | 0.95 (556) | -1.49 | -0.53 |
| Luxembourg [1] | 0.84 (216) | -0.15 | -3.18 | 0.69 (216) | 2.07 | 2.3 | 0.96 (216) | -1.19 | -0.44 |
| Madrid [4] | 0.65 (486) | 0.39 | 24.83 | 0.76 (486) | -0.14 | -0.16 | 0.9 (486) | -0.54 | -0.19 |
| Nicosia [5] | 0.55 (658) | -0.26 | -9.32 | 0.79 (658) | 2.91 | 4.23 | 0.9 (658) | -0.61 | -0.21 |
| Oslo [5] | 0.42 (379) | 1.03 | 60.64 | 0.65 (600) | 1.8 | 2.23 | 0.88 (600) | -0.68 | -0.25 |
| Paris [7] | 0.63 (864) | 0.58 | 29.17 | 0.64 (864) | 9.51 | 11.95 | 0.87 (864) | -1.21 | -0.44 |
| Prague [5] | 0.83 (647) | 0.07 | 2.05 | 0.74 (647) | -4.27 | -5.22 | 0.94 (647) | -0.46 | -0.17 |
| Reykjavik [3] | 0.68 (214) | -0.94 | -18.61 | 0.84 (214) | 8.61 | 10.45 | 0.6 (214) | -1.65 | -0.59 |
| Riga [1] | 0.59 (216) | 1.44 | 38.38 | 0.76 (216) | -6.42 | -7.16 | 0.94 (216) | -0.14 | -0.05 |
| Rome [4] | 0.28 (604) | 0.27 | 13.13 | 0.73 (604) | 3.55 | 4.81 | 0.89 (604) | -0.13 | -0.05 |
| Rotterdam [2] | 0.85 (430) | -0.4 | -10.42 | 0.72 (216) | 0.21 | 0.24 | 0.93 (216) | -0.53 | -0.19 |
| Sofia [1] | 0.7  (216) | -0.5 | -16.69 | 0.53  (216) | -5.76 | -7.69 | 0.77  (216) | -0.99 | -0.36 |
| Stockholm [3] | 0.85 (216) | 0.21 | 5.82 | 0.77 (216) | 5.46 | 6.83 | 0.97 (216) | -1.42 | -0.52 |
| Tallinn [1] | 0.91 (216) | -0.39 | -9.03 | 0.74 (216) | 0.13 | 0.15 | 0.94 (216) | -1.05 | -0.39 |
| Valetta [1] | 0.75 (216) | 1.25 | 36.22 | 0.86 (216) | -4.67 | -6.02 | 0.85 (216) | 0.79 | 0.27 |
| Vienna [5] | 0.77  (819) | 0.42 | 10.99 | 0.51  (862) | -4.82 | -6.07 | 0.79  (862) | -0.47 | -0.17 |
| Vilnius [1] | 0.84 (216) | -0.15 | -3.18 | 0.69 (216) | 2.07 | 2.3 | 0.96 (216) | -1.19 | -0.44 |
| Warsaw [2] | 0.77 (306) | 0.62 | 14.92 | 0.73 (306) | 2.06 | 2.36 | 0.94 (306) | -0.58 | -0.21 |
| Zagreb [4] | 0.22  (396) | -0.33 | -20.23 | 0.65  (396) | -2.72 | -3.62 | 0.79  (396) | 0.44 | 0.16 |
| Zurich [7] | 0.14 (1065) | 0.34 | 38.13 | 0.31 (1065) | -7.66 | -8.72 | 0.62 (1065) | 0.03 | 0.01 |
|  |  |  |  |  |  |  |  |  |  |
| All cities  [112] | 0.84  (16085) | 0.25 | 8.08 | 0.59  (16369) | -1.95 | -2.38 | 0.95  (16581) | -0.35 | -0.13 |

**Table S3.** Total anthropogenic emissions over Paris and London for each day from 01 to 09 December 2016, for CO, NH3, NOx, fine primary particulate matter (denoted as PM2.5), coarse primary particulate matter (denoted as PMco) SOx, and NMVOC as used in the EMEP model.

| **Emission (kg)** | **01 Dec** | **02 Dec** | **03 Dec** | **04 Dec** | **05 Dec** | **06 Dec** | **07 Dec** | **08 Dec** | **09 Dec** |
| --- | --- | --- | --- | --- | --- | --- | --- | --- | --- |
| **Paris** | | | | | | | | | |
| **CO** | 82.7 | 86.2 | 73.5 | 72.9 | 83.0 | 81.7 | 82.1 | 82.4 | 85.9 |
| **NH3** | 0.7 | 0.7 | 0.6 | 0.6 | 0.7 | 0.7 | 0.7 | 0.7 | 0.7 |
| **NOx** | 53.3 | 55.9 | 47.2 | 46.5 | 53.8 | 52.9 | 53.2 | 53.6 | 56.2 |
| **PM2.5** | 5.9 | 6.1 | 4.6 | 4.3 | 5.9 | 5.8 | 5.9 | 5.9 | 6.1 |
| **PMco** | 3.8 | 3.9 | 2.4 | 1.8 | 3.8 | 3.8 | 3.8 | 3.8 | 3.8 |
| **SOx** | 8.6 | 8.6 | 7.5 | 7.2 | 8.8 | 8.8 | 8.9 | 9.0 | 9.1 |
| **NMVOC** | 52.6 | 53.2 | 35.9 | 21.4 | 52.2 | 51.9 | 51.9 | 51.7 | 52.3 |
| **London** | | | | | | | | | |
| **CO** | 116.8 | 120.3 | 101.2 | 100.6 | 115.7 | 114.7 | 116.4 | 115.7 | 119.2 |
| **NH3** | 1.2 | 1.3 | 1.0 | 1.0 | 1.2 | 1.2 | 1.2 | 1.2 | 1.3 |
| **NOx** | 43.9 | 45.1 | 38.8 | 38.8 | 43.3 | 43.1 | 43.7 | 43.4 | 44.6 |
| **PM2.5** | 2.8 | 2.9 | 2.3 | 2.3 | 2.8 | 2.8 | 2.8 | 2.8 | 2.9 |
| **PMco** | 1.5 | 1.5 | 1.1 | 0.9 | 1.5 | 1.5 | 1.5 | 1.5 | 1.5 |
| **SOx** | 3.8 | 3.7 | 3.1 | 3.1 | 3.7 | 3.7 | 3.8 | 3.7 | 3.7 |
| **NMVOC** | 46.2 | 46.3 | 30.7 | 17.4 | 45.8 | 45.8 | 45.9 | 45.6 | 45.6 |
